# Supplementary material
Source: PubMed Central journal article supplement (PMC5597964)
Supplement: NIHMS903431-supplement-Supporting_text_and_data.pdf [file NIHMS903431-supplement-Supporting_text_and_data.pdf]

# Supplementary Information:

## Mechanism of O<sub>2</sub> diffusion and reduction in [FeFe] hydrogenases

Adam Kubas,<sup>†,‡,@</sup> Christophe Orain,<sup>¶,@</sup> David De Sancho,<sup>§,@</sup> Laure Saujet,<sup>||</sup> Matteo Sensi,<sup>¶</sup> Charles Gauquelin,<sup>⊥</sup> Isabelle Meynial-Salles,<sup>⊥</sup> Philippe Soucaille,<sup>⊥</sup> Hervé Bottin,<sup>||</sup> Carole Baffert,<sup>¶</sup> Vincent Fourmond,<sup>¶</sup> Robert B. Best,<sup>#</sup> Jochen Blumberger,<sup>\*,†</sup> and Christophe Léger<sup>\*,¶</sup>

E-mail: j.blumberger@ucl.ac.uk; christophe.leger@imm.cnrs.fr

---

\*To whom correspondence should be addressed

<sup>†</sup>Department of Physics and Astronomy, University College London, Gower Street, London WC1E 6BT, UK

<sup>‡</sup>Institute of Physical Chemistry, Polish Academy of Science, ul. Kasprzaka 44/52, Warsaw, Poland

<sup>¶</sup>Aix Marseille Université, CNRS, BIP UMR 7281, 13402, Marseille, France.

<sup>§</sup>Department of Chemistry, University of Cambridge, Lensfield Road, Cambridge CB2 1EW, United Kingdom; CIC nanoGUNE, Tolosa Hiribidea 76, 20018 Donostia-San Sebastián, Spain and IKERBASQUE; Basque Foundation for Science, María Díaz de Haro 3, 48013 Bilbao, Spain

<sup>||</sup>Institut de Biologie et de Technologies de Saclay IBITECS, SB2SM, F-91191 Gif sur Yvette, France / Institut de Biologie Intégrative de la Cellule I2BC, UMR 9198, CEA, CNRS, Université Paris Sud, F-91191 Gif sur Yvette, France

<sup>⊥</sup>Université de Toulouse, INSA, UPS, INP, LISBP, INRA:UMR792,135 CNRS:UMR 5504, avenue de Rangueil, 31077 Toulouse, France

<sup>#</sup>Laboratory of Chemical Physics, National Institute of Diabetes and Digestive and Kidney Diseases, National Institutes of Health, Bethesda, Maryland 20892-0520, United States

<sup>@</sup>Contributed equally to this work.

# Contents

|                                                                                 |            |
|---------------------------------------------------------------------------------|------------|
| <b>S1 Derivation of expression for <math>k_i</math>, Eq. 3 in main text.</b>    | <b>S3</b>  |
| <b>S2 MD simulation and Markov state model</b>                                  | <b>S5</b>  |
| S2.1 Force field parameters . . . . .                                           | S8         |
| S2.2 Equilibrium MD . . . . .                                                   | S8         |
| S2.3 Pulling simulations . . . . .                                              | S9         |
| S2.4 Kinetics of barrier crossing processes induced by force . . . . .          | S10        |
| S2.5 Markov state model of gas diffusion in hydrogenase . . . . .               | S12        |
| S2.6 Explicit simulations of mutants . . . . .                                  | S15        |
| <b>S3 Further discussion of the non-redox reactivation (<math>k_a</math>)</b>   | <b>S18</b> |
| <b>S4 Quantum mechanical (QM) calculations</b>                                  | <b>S18</b> |
| S4.1 Molecular model and electronic structure method . . . . .                  | S18        |
| S4.2 Calculation of reaction free energies for PT coupled ET . . . . .          | S22        |
| S4.3 Validation of QM calculations . . . . .                                    | S24        |
| <b>S5 Caption of fig 2 and the site-directed mutants of Cr FeFe hydrogenase</b> | <b>S30</b> |
| S5.1 Caption of fig 2 . . . . .                                                 | S30        |
| S5.2 The site-directed mutants . . . . .                                        | S31        |
| S5.2.1 C169D . . . . .                                                          | S31        |
| S5.2.2 V296F . . . . .                                                          | S31        |
| S5.2.3 F290Y . . . . .                                                          | S33        |
| S5.2.4 F290W . . . . .                                                          | S33        |
| <b>S6 XYZ coordinates of computed structures, Fig. 5 main text</b>              | <b>S34</b> |
| <b>S7 Supplementary references (cited in main text)</b>                         | <b>S39</b> |
| <b>References cited in SI</b>                                                   | <b>S39</b> |

## S1 Derivation of expression for $k_i$ , Eq. 3 in main text.

The inhibition of FeFe-hydrogenase with  $O_2$  is described by the bimolecular rate constant  $k_i$  and the reverse process by the unimolecular rate constant  $k_a$ .

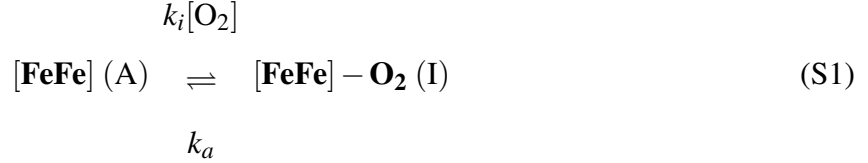

The inhibition is further divided in a diffusion process with rate constants  $k_{+1}$  and  $k_{-1}$  and chemical attachment/detachment with rate constants  $k_{+2}$  and  $k_{-2}$ .

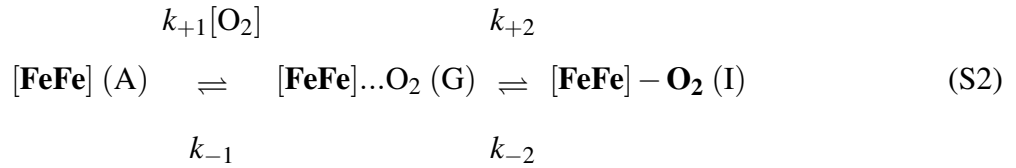

The time dependence of the concentrations of the geminate state G, inhibited state I and active state A are given by the usual kinetic equations,

$$\frac{d[G]}{dt} = k_{+1}[A][O_2] + k_{-2}[I] - (k_{-1} + k_{+2})[G] \quad (S3)$$

$$\frac{d[I]}{dt} = k_i[A][O_2] - k_a[I] = k_{+2}[G] - k_{-2}[I] \quad (S4)$$

$$\frac{d[A]}{dt} = k_a[I] - k_i[A][O_2] = k_{-1}[G] - k_{+1}[A][O_2] \quad (S5)$$

At equilibrium,  $\frac{d[I]}{dt} = \frac{d[A]}{dt} = \frac{d[G]}{dt} = 0$  and  $[A] = [A]_{eq}$ ,  $[I] = [I]_{eq}$ ,  $[G] = [G]_{eq}$  and  $[O_2] = [O_2]_{eq}$ . Insertion of these conditions in Eqs. S4 and S5 gives the equilibrium constants in terms of the rate

constants,

$$K_i \equiv \frac{[I]_{\text{eq}}}{[A]_{\text{eq}}[O_2]_{\text{eq}}} = \frac{k_i}{k_a} \quad (\text{S6})$$

$$K_{+1} \equiv \frac{[G]_{\text{eq}}}{[A]_{\text{eq}}[O_2]_{\text{eq}}} = \frac{k_{+1}}{k_{-1}} \quad (\text{S7})$$

$$K_{+2} \equiv \frac{[I]_{\text{eq}}}{[G]_{\text{eq}}} = \frac{k_{+2}}{k_{-2}}. \quad (\text{S8})$$

Therefore,  $K_i = K_{+1}K_{+2}$  and

$$k_a = \frac{k_{-1}k_{-2}}{k_{+1}k_{+2}}k_i. \quad (\text{S9})$$

To describe the kinetics of reaction schemes such as the one shown in Eq. S2, one usually assumes the steady-state approximation for the intermediate state, here state G. That is, after a short initial window of time, the concentration of G is assumed to remain unchanged during the course of the reaction,

$$\frac{d[G]}{dt} = 0. \quad (\text{S10})$$

In previous work on ligand diffusion in the enzyme CODH/ACS, the steady state assumption Eq. S10 was shown to give an excellent approximation.<sup>1</sup> Here, we make a second assumption,  $k_{-2} \ll k_{+2}$ , which is indeed valid for the reaction we consider in this work (see main text). Hence, at the beginning of the reaction where the concentration of I is still low, the reaction from I back to G can be neglected,

$$k_{-2}[I] \ll k_{+2}[G], \quad (\text{S11})$$

and therefore also the reaction from I back to A,

$$k_a[I] \ll k_{+2}[G]. \quad (\text{S12})$$

Insertion of Eqs. S10 and S11 in Eq. S3 gives

$$[A][O_2] = \frac{k_{-1} + k_{+2}}{k_{+1}}[G], \quad (\text{S13})$$

and insertion of Eqs. S13, S11 and S12 in Eq. S4 gives the final expression for the inhibition rate,

$$k_i = \frac{k_{+1}}{k_{-1} + k_{+2}} k_{+2}. \quad (\text{S14})$$

The rate for re-activation (here detachment and diffusion out of the protein) is obtained by inserting Eq. S14 in Eq. S9,

$$k_a = \frac{k_{-1}}{k_{-1} + k_{+2}} k_{-2}. \quad (\text{S15})$$

## S2 MD simulation and Markov state model

In order to understand the dynamics of the diffusion of gas molecules from the solvent into the protein active site, we used an approach that has been developed previously by some of us.<sup>1-5</sup> The first step involves extensive atomistic molecular dynamics simulation of the protein and the gas molecules solvated in explicit water. The structure of *Clostridium acetobutylicum* (Ca) FeFe hydrogenase has not been resolved experimentally and the structure available for *Chlamydomonas reinhardtii* (Cr) FeFe hydrogenase does not include the mature H-cluster.<sup>6</sup> Hence we have resorted to use the structure of their homolog from *Clostridium pasteurianum* (Cp) to run the simulations (PDB id: 3c8y<sup>7</sup>). Although the details of the diffusion may change slightly from protein to protein, we note that there is good support for the transferability of the results. In the alignment between the three sequences we find that the identity between Cp and Ca is very high (71.5%; see also Fig. S2a). In the case of Cr, the sequence identity is considerably lower (34.5%). However the sequence similarity is high in the region corresponding to the main access paths (see Fig. S2b), and particularly for the residues that line the access tunnels we mostly find identity between the three sequences (see colour code in Fig. S1). To finalize we note that even the Cr structure lacking the mature H-cluster has very good structural similarity (1.89 Å *RMSD*) over the aligned region with the Cp enzyme used in the simulations (see Fig. S2c).

As detailed below we have run a combination of long equilibrium simulations where we aimed for broad sampling of ligand diffusion within the protein and the solvent, and shorter runs from

```

3c8y          MKTIIINGVQFNTDEDTTILKFARDNNIDISALCFLNNCNNDINKCEICTVEVEGTGLVT 60
Q9FYU1_CHLRE -----
Q59262_CLOAT MKTIIILNGNEVHTDKDITILELARENNDIPTLCLFKDCGN-FGKCGVCMVEVEGKGFRA 59

3c8y          ACDTLIEDGMIINTNSDAVNEKIKSRISQLLDIHEFKCGPCNRRENCEFLKLVIKYKARA 120
Q9FYU1_CHLRE -----
Q59262_CLOAT ACVAKVEDGMVINTESDEVKERIKRVSMLLDKHEFKCGQCSRRENCEFLKLVIKTKAKA 119

3c8y          SKPFLPKDKTEYVDERSKSLTVDRTKLCLCGRCVNACGKNTETYAMKFLNKGKTIIGAE 180
Q9FYU1_CHLRE -----MSALVLKPCAASVIRGS-----SCRARQVAPRAPLAASTVRVALATL 42
Q59262_CLOAT SKPFLPEDKDALVDNRSKAIVIDRSKCVLCGRVCAACKQHTSTCSIQFIKKGQRAVGTV 179
                * : . : : : :          : * . : : . : : :
                * : . : : : :          : * . : : . : : :

3c8y          DEKCFDDTNCLLGGQCIACPVAAALSEKSHMDRVKNALNAPEKHVIVAMAPSVRASIGEL 240
Q9FYU1_CHLRE EAPARRLGNVACAAAAPAAEAPLSHVQQAALAEAKPKDDPTRKHVCVQVAPAVRVAIAET 102
Q59262_CLOAT DDVCLDDSTCLLGGQCVIACPVAAALKEKSHIEKVQEALNDPKKHVIVAMAPSVRTAMGEL 239
                : . . . * : : : : : : : . * * * * : * : * : * : * : * : *

3c8y          FNMFGVDVTGKIYALRQLGFDKIFDINFGADMTIMEEATELVQRIEN-----NGP 292
Q9FYU1_CHLRE LGLAPGATTPKQLAEGLRRLGFDEVFDTLFGADLTIMEEGSELLHRLTEHLEAHPHSDPEP 162
Q59262_CLOAT FKMGYGKDVTKGLYALRMLGFDKVFDFINFGADMTIMEEATELLGRVKN-----NGP 291
                : : . * . : : . * * * : * * * * : * * * : * * * : * : : : *

3c8y          FPMFTSCCPGWVQAENYYPELLNLSAKSPQQIFGTASKTYYPISGLDPKNVFTVTV 352
Q9FYU1_CHLRE LPMFTSCCPGWIAMLEKSYPDLPYVSSCKSPQMMLAAMVKSYLEAKKGIAPKDMVMVSI 222
Q59262_CLOAT FPMFTSCCPAWVRLAQNYHPELLDNLSSAKSPQQIFGTASKTYYPISGIAPEDEVYVTI 351
                : * * * * * : * : : * : * : * * * : : : * : * . : * : * : * : * : *

3c8y          MPCTSKKFEADRPQMEKD---GLRDIDAVITRELAKMIKDAKIPFAKLEDSEADPAMGE 409
Q9FYU1_CHLRE MPCTRKQSEADRDWFCVDADPTLRQLDHWITTVELGNIFKERGINLAELPEGEWDPNPMGV 282
Q59262_CLOAT MPCNDKKYEADIPFMETN--SLRDIDASLTRELAKMIKDAKIKFADLEGEVDPAMGT 408
                * * * . * : * * : : * * : * : * * * : * : * : * * * *

3c8y          YSGAGAIFGATGGVMEAAALRSKADFAENAELEDIEYKQVRGLNGIKEAEVEINN----- 463
Q9FYU1_CHLRE GSGAGVLFGTGGVMEAAALRTAYELFTGTPLRPLSLSEVRGMDGIKETNITMVPAPGSKF 342
Q59262_CLOAT YSGAGAIFGATGGVMEAAAIRSAKADFAENKELENVDYTEVRGFKGIKEAEVEIAG----- 462
                * * * . : * * : * * * * * : * * : * : * * * : * * : * : * : * : *

3c8y          -----NKYNVAVINGASNLKFKMKSG 484
Q9FYU1_CHLRE EELLKHRAAARAEAAAHTPGPLAWDGGAGFTSEDGRGGITLRVAVANGLGNAKKLITKM 402
Q59262_CLOAT -----NKLNVAVINGASNFFEFMKSG 483
                . * * * * * * * : : : .

3c8y          MINEKQYHFIEVMACHGGCVNGGGQPHVNPDKLEKVDIKKVRASVLYNQDE-HLSKRKSH 543
Q9FYU1_CHLRE QAGEAKYDFVEIMACPGCVGGGGQPRST-----DKAITQKRQAALYNLDE-KSTLRKSH 456
Q59262_CLOAT KMNEKQYHFIEVMACPGGCGINGGGQPHVNALDRENVDRKLRASVLYNQDKNVLSKRKSH 543
                * : * : * : * * * * : * * * : * . : * : * * * * : * : * *

3c8y          ENTALVKMYQNYFGKPGEGRAHEILHFYK----- 574
Q9FYU1_CHLRE ENPSIRELYDTYLGEPLGHKAHELLHTHYVAGGVEEKDEKK 497
Q59262_CLOAT DNPAAIKMYDSYFGKPGEGLAHKLHVKYTKDKNVSKHE-- 582
                : * : : : * : * : * * * * : * * : * * : *

```

Figure S1: Alignment of the Cp (PDB: 3C8Y), Ca (Uniprot: Q9FYU1) and Cr (Uniprot: Q59262) FeFe hydrogenase sequences produced using the Clustal<sup>8</sup> implementation included in the MultiSeq extension<sup>9</sup> of the VMD program.<sup>10</sup> Residues coloured in blue and red are lining the main access paths (1 and 2, respectively) to the H-cluster.

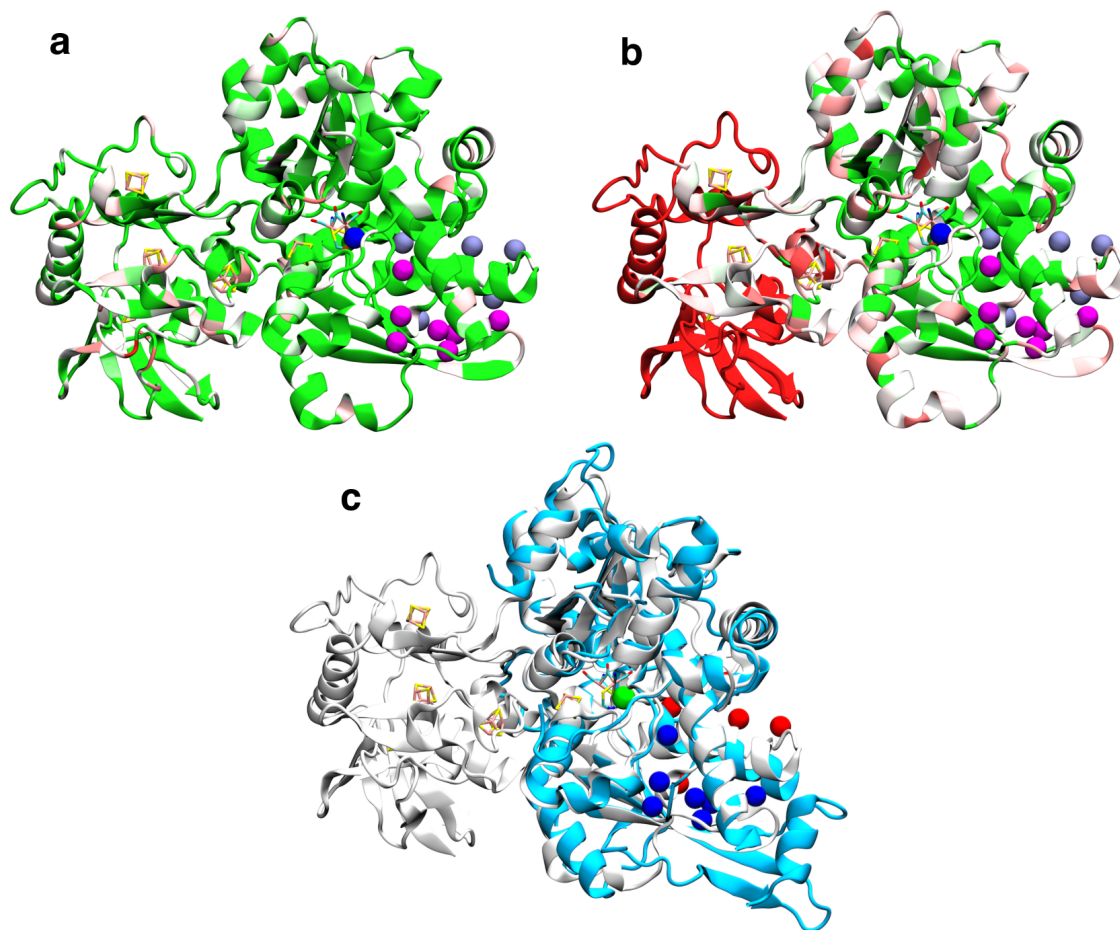

Figure S2: (a-b) Cartoon representation of Cp hydrogenase with atomic detail for metal clusters and magenta and ice blue spheres indicating the clusters involved in the main access paths reaching the geminate site (blue sphere). The red-white-green colour code indicates structure similarity between Cp and Ca (a) and Cp and Cr (b), with red indicating low similarity and green indicating high similarity. The BLOSUM80 similarity scoring matrix was used. (c) Overlay between the experimental structure of immature Cr (cyan) and Cp (white). Color code of relevant clusters as in the main manuscript. Figures were produced using the MultiSeq extension<sup>9</sup> of the VMD program.<sup>10</sup>

the pockets deep inside the protein to improve the statistics, resulting in an aggregate simulation time of over 1.9  $\mu$ s. All simulations were carried out using the Gromacs software package, version 4.6.<sup>11</sup>

## S2.1 Force field parameters

We used the optimized Amber03w force field<sup>12</sup> together with the TIP4P/2005 water model.<sup>13</sup> Parameters for the active site cluster and iron-sulfur clusters were taken from the DFT-derived force field of Chang and Kim.<sup>14</sup> For the O<sub>2</sub> molecule we used a three-site model, with a bond length between the O<sub>2</sub> atoms of 1.21 Å and a mass-less virtual site located in the center of mass of the gas molecule. The oxygen atoms carry charges of -0.114 and the virtual atom 0.228, in order to reproduce a quadrupole moment.<sup>15,16</sup> The Lennard-Jones parameters for the virtual atom are  $\epsilon = 0.4305$  kJ/mol and 3.01 Å.

## S2.2 Equilibrium MD

First, we run two sets of long ( $\sim 100$  ns) equilibrium simulations of the protein together with 50 O<sub>2</sub> molecules. The initial structure was energy minimized using a conjugate gradient algorithm. Then the protein molecule was solvated in a truncated octahedron water box with 79.2 Å between closest walls, including 29807 water molecules, and then further energy minimized. Water molecules were replaced to include 75 Na<sup>+</sup> and 60 Cl<sup>-</sup> ions to the simulation box. The resulting simulation system was used as the starting point for a short NVT simulation at 300 K with position restraints in the protein and metal clusters. Finally long equilibrium simulations were run at 300 K using a stochastic leap frog integrator with an integration timestep of 2 fs and a friction coefficient of 1 ps<sup>-1</sup>. The particle-mesh Ewald method was used for the electrostatics<sup>17</sup> with a grid spacing of 1.2 Å and a real-space cutoff of 9 Å.

In the long equilibrium runs none of the 50 gas molecules reached the proximity of the H-cluster. In the spirit of adaptive sampling<sup>18</sup> we initialized tens of short simulations from the closest sites to the active site, and from the active site itself. Even this was insufficient for sampling the last transitions from the protein pockets to the active site. A summary of the actual runs and total simulation time is shown in Table S1.



Table S1: Summary of the equilibrium atomistic molecular dynamics simulations run for this study.

| Run           | Number of runs | Simulation time [ns] | Aggregate time [ns] |
|---------------|----------------|----------------------|---------------------|
| Equilibrium 1 | 1              | 92.6                 | 92.6                |
| Equilibrium 2 | 1              | 142.4                | 142.4               |
| Short Eq. 1   | 5              | 20                   | 100                 |
| Short Eq. 2   | 5              | 20                   | 100                 |
| Short Eq. 3   | 5              | 20                   | 100                 |
| Short Eq. 4   | 5              | 20                   | 100                 |
| Short Eq. 5   | 5              | 20                   | 100                 |
| Short Eq. 6   | 5              | 20                   | 100                 |
| Short Eq. 7   | 5              | 20                   | 100                 |
| Short Eq. 8   | 50             | 20                   | 1000                |
| Total         | 87             |                      | 1935                |

### S2.3 Pulling simulations

For a subset of the microstates from the model (those closest to the H-cluster), we have run simulations in the presence of an external pulling force. To set up these runs, we first placed a single  $O_2$  molecule at the center of a cluster corresponding to a microstate using a randomly chosen snapshot of the solvated protein. The resulting system was energy minimized and a short NVT simulation in the presence of position restraints was run to avoid very high forces. Then short simulations in the presence of an external pulling force were run using the pull code from the Gromacs software package.<sup>11</sup> The center of mass of the gas molecule was dragged towards a reference site, defined as the center of mass of a selection of atoms from the H-cluster, shown in Figure S3.

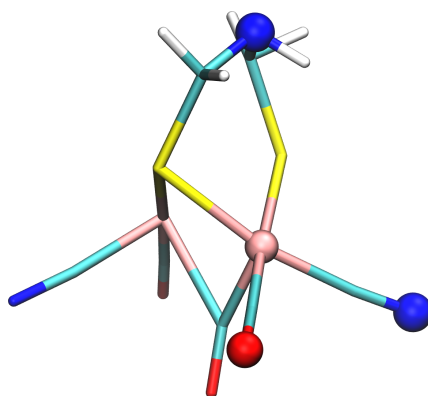

Figure S3: Representation of the H-cluster, with selected atoms used as target site for the pulling simulations represented as spheres.

## S2.4 Kinetics of barrier crossing processes induced by force

The results of the MD simulations of force induced transitions to the H-cluster were fitted using the Dudko-Hummer-Szabo model.<sup>19</sup> Briefly, this model assumes that the transitions in the presence of an external force can be explained as a diffusive barrier crossing process on a simplified free energy surface. The escape rate over the barrier is expressed as

$$k(F) = k_0 \left(1 - \frac{\nu F x^\ddagger}{\Delta G^\ddagger}\right)^{1/\nu-1} e^{(\Delta G^\ddagger [1 - (1 - \nu F x^\ddagger / \Delta G^\ddagger)^{1/\nu}])}, \quad (\text{S16})$$

where the model parameters are the transition rate in the absence of force ( $k_0$ ), the position of the transition state ( $x^\ddagger$ ) and the free energy barrier ( $\Delta G^\ddagger$ ). Another model parameter is  $\nu$ , which determines the shape of the one-dimensional potential (in this case we set  $\nu = 1/2$ , corresponding to a linear cubic surface).<sup>19</sup>

For each of the pulling simulations  $i$  at force  $F$ , we calculate the transition time  $t_i$  as the time it takes for the distance to reach the H-cluster site (we set the cutoff distance for an effective transition at 2.5 Å from the selected atoms of the H-cluster, corresponding to the center of the distribution of gas molecules in that site; see Figure S4). To calculate the maximum likelihood transition time for the  $N$  runs started from each microstate we use the expression

$$\tau = N_b^{-1} \left\{ \sum_{i=1}^{N_b} t_i + \sum_{i=N_b+1}^N T_i \right\}, \quad (\text{S17})$$

where  $T_i$  is the total time of the simulations that did not reach the H-cluster and  $N_b$  is the total number of trajectories that bind. Errors were estimated as  $\tau/N_b^{1/2}$ .

In Figure S5 we show the results from the pulling simulations for those sites from which we observe that binding is most likely. The theory for force-induced transitions explains the data very well, and returns values for the rate in the absence of force,  $k_0$ , which we later combine with the rates derived from the Markov state model.

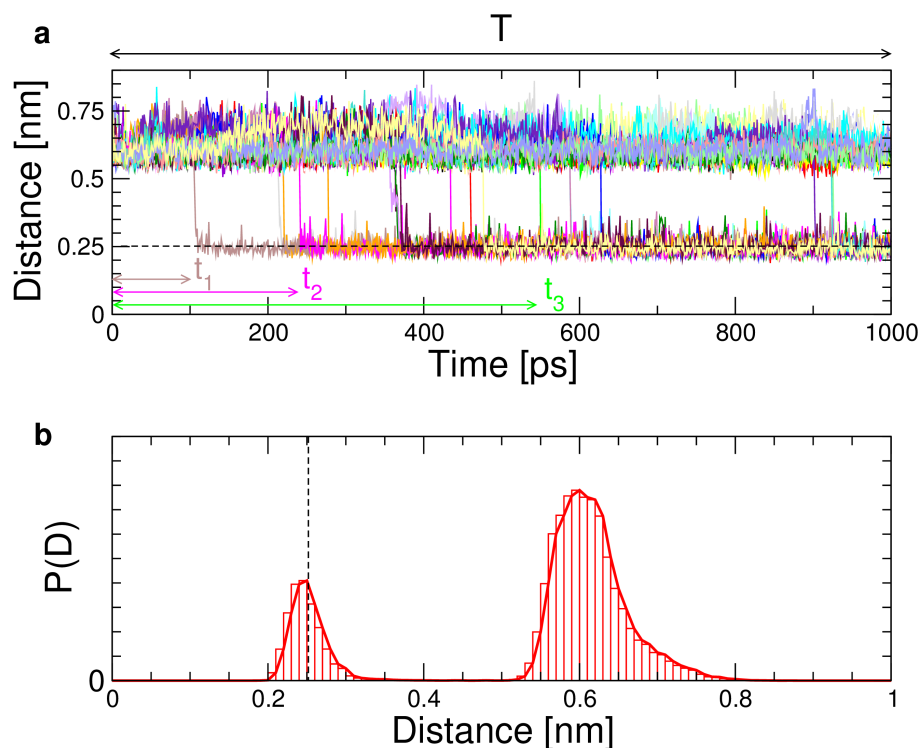

Figure S4: (a) Time series for the distance between the virtual atom of the  $O_2$  molecule and the center of mass of the selected atoms from the H-cluster, calculated from 50 MD pulling runs. We mark illustrative examples of transition times  $t_i$  for three runs as well as the total simulation length  $T$ . (b) Distribution of values of the distance calculated for the same dataset. In both plots the dashed line marks the distance at which we assume that the geminate site has been reached.

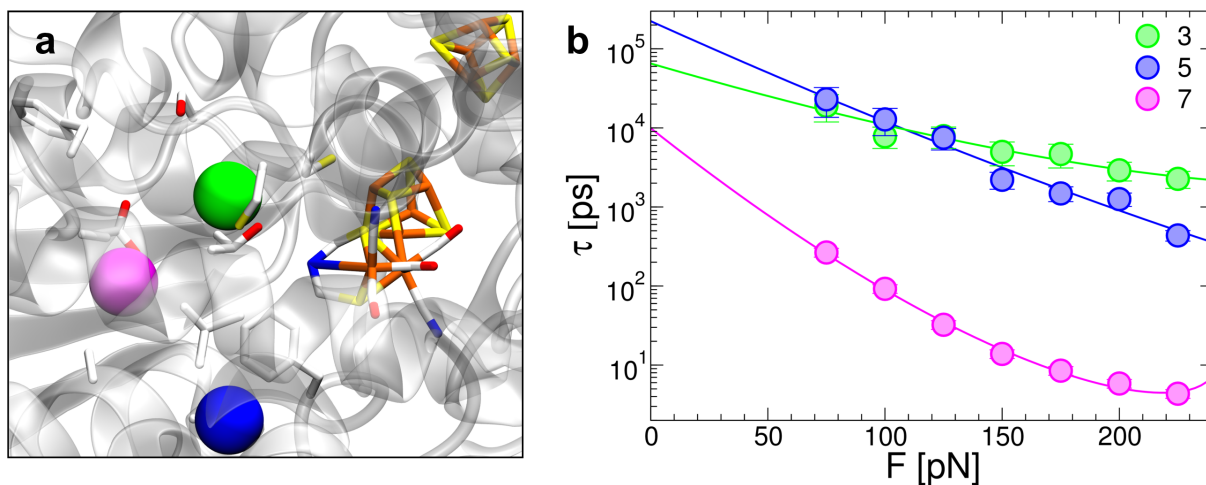

Figure S5: (a) Selected initial states for the pulling simulations (spheres). Atomic detail is shown also for the H-cluster. The protein is shown as transparent ribbon. (b) Force dependent binding times estimated from simulations initiated from the different initial states (colours as in (a)). Fits to the Dudko-Hummer-Szabo theory are shown as lines.

## S2.5 Markov state model of gas diffusion in hydrogenase

We describe the kinetics of gas diffusion of the O<sub>2</sub> molecules within the protein using a Markov state model (MSM).<sup>20–22</sup> The MSM was built using the methods described previously.<sup>5</sup> We briefly summarize the methodology below. The construction of an MSM involves the following steps: discretizing the MD simulation data, assigning the transitions to the microstates, estimating the transition count and rate matrices, and validating the model.

**Discretization.** The coordinates of the O<sub>2</sub> molecules from the long equilibrium runs within a maximum of 6 Å from protein heavy atoms were clustered using the Daura algorithm with a cutoff of 5 Å.<sup>23</sup> We filtered the initial set of clusters, including only the most populated clusters which account for up to a 95% of the total simulation time. This resulted in a total of 212 microstates.

**Assignment.** For assigning an instantaneous position of an O<sub>2</sub> molecule to one of the clusters we used transition based assignment (TBA).<sup>22,24</sup> For each of the clusters, we calculated the distribution of distances from each of the cluster members to the cluster center, and defined a TBA radius,  $r_{\text{TBA}}$ , as the value corresponding to the distance that lies at the median of the population of the cluster. Each of the O<sub>2</sub> atoms from each instantaneous configuration was then assigned to a microstate  $i$  whenever the virtual atom of the O<sub>2</sub> was closer than  $r_{\text{TBA}}(i)$  from the corresponding cluster center. A transition from a microstate  $i$  to another microstate  $j$  was assigned only if after leaving microstate  $i$ , the virtual site of the gas molecule approached the center of cluster  $j$  at less than  $r_{\text{TBA}}(j)$ . This type of assignment greatly reduces the number of recrossings, which would result in artificially fast rates.<sup>22</sup> For escaping from any of the microstates to the solvent, we imposed a hard cutoff distance of 6 Å from any alpha carbon of the protein. Using this criterion we assigned all trajectories to the model microstates.

**Estimation of rate matrix.** Using the assigned trajectories one can simply calculate the transition count matrix,  $\mathbf{N}(\Delta t)$ , with elements  $N_{ji}(\Delta t)$  corresponding to the number of transitions observed from state  $i$  to state  $j$  within an observation window (or lag time)  $\Delta t$ . From the transition count matrix we obtain the transition probability matrix  $\mathbf{T}(\Delta t)$ , with elements calculated using the

maximum likelihood estimator<sup>25</sup>

$$t_{ji}(\Delta t) = N_{ji}(\Delta t) / \sum_j N_{ji}(\Delta t) \quad (\text{S18})$$

To obtain the rate matrix  $\mathbf{K}(\Delta t)$  we use the approximation  $k_{ji}(\Delta t) = t_{ji}(\Delta t) / \Delta t$  for  $i \neq j$  and  $k_{ii}(\Delta t) = -\sum_j k_{ji}(\Delta t)$ .<sup>26</sup> In Figure S6a we show the relaxation times from the rate matrix as obtained from the eigenvalues of the rate matrix  $\tau_i = -1/\lambda_i$ .

We connect the rate matrix calculated from the equilibrium MD runs to the fitted rates at zero force ( $k_{Gi}(0)$ ) by adding a row and a column to the rate matrix (corresponding to the  $G \rightarrow i$  and  $i \rightarrow G$  transitions, respectively). The rates for the additional column are zero except for those microstates from which we run pulling simulations, for which we use  $k_{Gi} = k_0$  from Equation S16. For the reverse rate ( $k_{iG}$ ) we use the results from short equilibrium runs initialized in the H-cluster.

The rate coefficients  $k_{is}$  for the transitions from the solvent  $s$  to the microstates  $i$  in the protein as obtained by the above procedure depend on the gas concentration used in the MD simulation. In order to obtain the rate coefficients at a reference concentration  $[\text{O}_2]^0 = 1 \text{ mM}$  we scale the  $k_{is}$  by a factor of  $V_{\text{sim}}^{\text{H}_2\text{O}} / V_{\text{ref}}^0$ .<sup>3</sup> Here  $V_{\text{sim}}^{\text{H}_2\text{O}}$  is the volume of water in the simulation, which we obtain from subtracting the volume of the protein ( $V_{\text{protein}} = 94.570 \text{ nm}^3$ ) from that of the simulation box

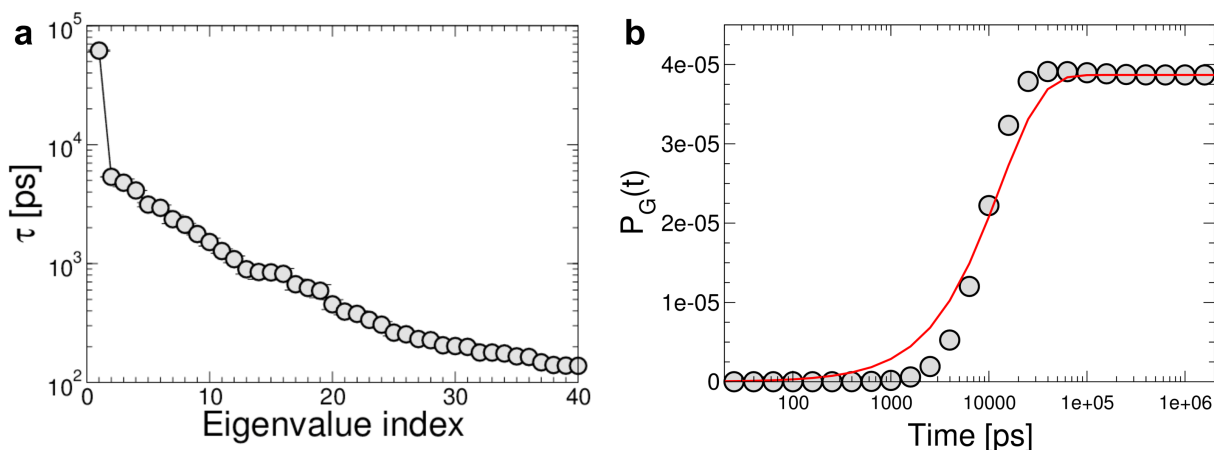

Figure S6: **(a)** Spectrum of eigenvalues of the rate matrix. Only the first 40 eigenvalues are shown. **(b)** Population of the geminate microstate as a function of time, from a calculated relaxation initiated in the solvent. The red line shows the fit to Equation S20

( $V_{\text{box}}=993.588 \text{ nm}^3$ ). Then the simulated concentration of gas is  $[\text{O}_2]=1.847 \text{ mM}$  and the scaling factor for the rate coefficients is  $V_{\text{sim}}^{\text{H}_2\text{O}}/V_{\text{ref}}^{\text{o}}=0.541$ .

**Validation.** The simplest test for the Markov property in an MSM is the convergence of relaxation times,  $\tau_i$  as a function of the lag time. In Figure S7 we show that indeed relaxation times for the MSM are well converged and remain stable for a long range of lag times. The results reported in this paper correspond to a lag time of 1 ps.

**Estimation of the binding rate from the MSM.** We calculate the rate of access to the H-cluster as before,<sup>2</sup> using the propagation of the rate matrix from an initial distribution placed at the solvent microstate (hence  $p_i(0) = 0$  for all states except  $i = s$ , where  $p_s(0) = 1$ ). The relaxation can be calculated from the matrix exponential as

$$\mathbf{P}(t) = \exp(\mathbf{K}t)\mathbf{P}(0) \quad (\text{S19})$$

In Figure S6b we show the relaxation for the geminate site  $p_G(t)$ . In order to obtain the rates of

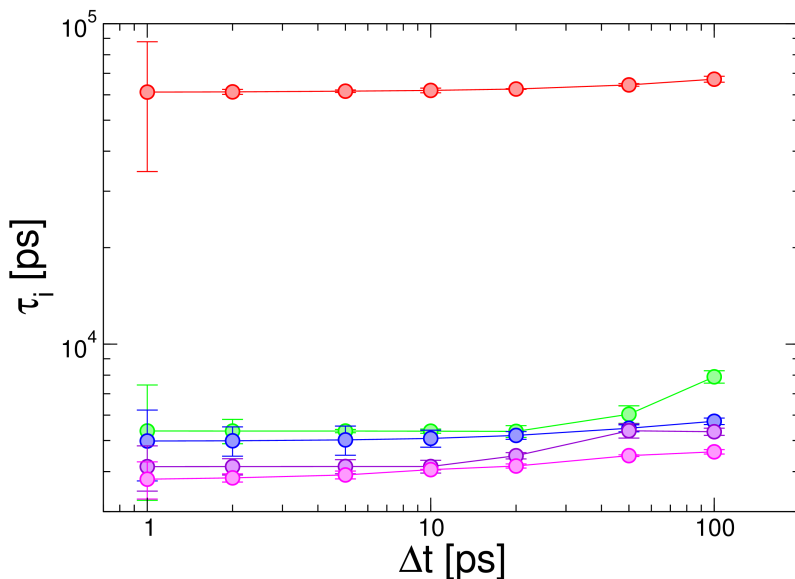

Figure S7: Convergence of relaxation times for the first few modes of the rate matrix. All times are in ps.

access to the geminate site we fit the data to the following expression

$$p_G(t) = \frac{k_{+1}[\text{O}_2]}{k_{+1}[\text{O}_2] + k_{-1}} [1 - \exp(-(k_{+1}[\text{O}_2] + k_{-1})t)] \quad (\text{S20})$$

to obtain the values of  $k_{+1}$  and  $k_{-1}$ . The data is well explained by this pseudo-first order rate expression.

## S2.6 Explicit simulations of mutants

For the F417W, F417Y and V423F we run explicit atomistic MD pulling simulations as described above, only for the last transition of the dominant pathway (i.e. for the 7→G step). The setup of these runs was done as described for the WT, with the initial structure corresponding to the highest ranked rotameric state, as defined by PyMOL. In the case of the V423F mutant simulations were run starting from the two most probable rotameric states. In Figure S8 we show the results. In all cases we obtain a slowdown of the final transition upon mutation. The effect is particularly strong for the mutations in site F417, where access to the geminate site via pathway 1 seems almost

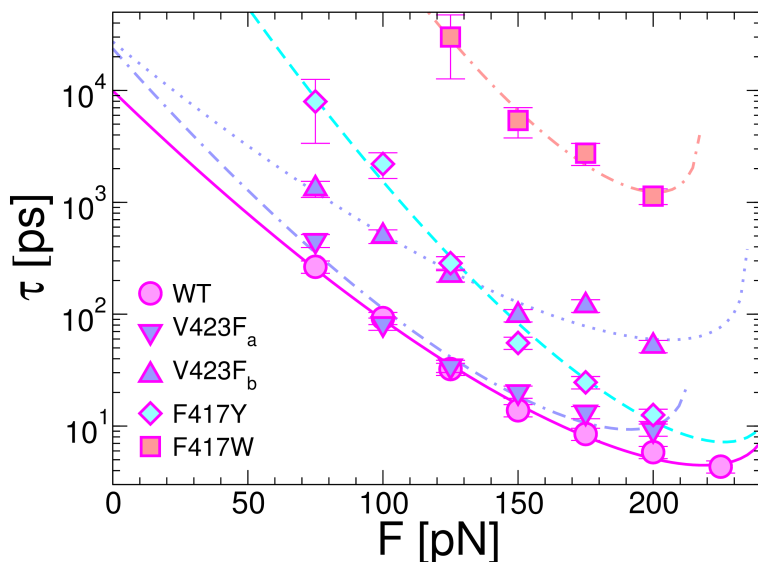

Figure S8: Force dependent binding times estimated from simulations initiated from site 7 for different mutants of Cp hydrogenase. Symbol filling colours correspond to different mutants. Lines, with the same colour code, are fits to the Dudko-Hummer-Szabo model.

completely inhibited. In the case of V423F we observe a slowdown for both rotameric states by a factor of about 2.



Table S2: Summary of the pulling simulations run for this study.

| Pulling site | Pulling force [pN] | Number of runs | Simulation time [ns] |
|--------------|--------------------|----------------|----------------------|
| 1            | 75                 | 48             | 3                    |
| 1            | 100                | 48             | 2                    |
| 1            | 125                | 48             | 2                    |
| 1            | 150                | 48             | 1                    |
| 1            | 175                | 48             | 1                    |
| 1            | 200                | 48             | 1                    |
| 1            | 225                | 48             | 1                    |
| 2            | 100                | 48             | 2                    |
| 2            | 150                | 48             | 1                    |
| 2            | 200                | 48             | 1                    |
| 3            | 75                 | 48             | 3                    |
| 3            | 100                | 48             | 2                    |
| 3            | 125                | 48             | 2                    |
| 3            | 150                | 48             | 1                    |
| 3            | 175                | 48             | 1                    |
| 3            | 200                | 48             | 1                    |
| 3            | 225                | 48             | 1                    |
| 4            | 100                | 48             | 2                    |
| 4            | 150                | 48             | 1                    |
| 4            | 200                | 48             | 1                    |
| 5            | 75                 | 48             | 3                    |
| 5            | 100                | 48             | 2                    |
| 5            | 125                | 48             | 2                    |
| 5            | 150                | 48             | 1                    |
| 5            | 175                | 48             | 1                    |
| 5            | 200                | 48             | 1                    |
| 5            | 225                | 48             | 1                    |
| 7            | 75                 | 64             | 3                    |
| 7            | 100                | 64             | 2                    |
| 7            | 125                | 64             | 2                    |
| 7            | 150                | 64             | 1                    |
| 7            | 175                | 64             | 1                    |
| 7            | 200                | 64             | 1                    |
| 9            | 200                | 48             | 1                    |
| Total        |                    |                | 2656                 |

### S3 Further discussion of the non-redox reactivation ( $k_a$ )

DFT structure optimizations of the O<sub>2</sub>-bound state (structure **2** in Figure 5, main text) show that the O-O bond length increases from 1.22 Å to 1.30 Å upon binding and that the distal oxygen carries a negative charge, which is stabilized through hydrogen bonding with Cys169. The closest contact O-O<sup>-</sup> ... HS-Cys169 is 2.16 Å. Proton transfer (PT) from the sulphur to the distal oxygen is only slightly uphill by 2.2 kcal/mol and the PT activation barrier equates 7.5 kcal/mol. Hence, PT is orders of magnitude faster than reactivation, observed on the time scale of 10-100 seconds. Besides, the cysteine is part of the proton transfer chain that connects the active site to the solvent.<sup>27-31</sup> This, together with our calculations, suggests that a fast, solution pH-dependent protonation equilibrium between Fe<sub>d</sub>-O<sub>2</sub> and Fe<sub>d</sub>-O<sub>2</sub>H<sup>+</sup> exists.

DFT calculations further show that dissociation of O<sub>2</sub>H<sup>+</sup> from the active site is energetically unfeasible (104.8 kcal/mol), whereas dissociation of O<sub>2</sub> is slow but feasible with a free energy barrier of 20.0 kcal/mol.<sup>32</sup> In the alkaline limit, where O<sub>2</sub>H<sup>+</sup> is negligible, and within the steady-state approximation for G, the re-activation rate for chemical detachment of O<sub>2</sub> and diffusion out of the protein is given by Eq. 15. Since  $k_{-1} \gg k_{+2}$ ,  $k_a = k_{-2} = 1.1 \cdot 10^{-2} \text{ s}^{-1}$ . This compares favourably with the experimental estimate for the re-activation rate in the alkaline limit,  $k_a > 1.0 \cdot 10^{-1} \text{ s}^{-1}$ . The deviation between computation and experiment (at least a 9-fold underestimation of  $k_a$ ) is similar to what we found for  $k_i$  (see main text). Here the deviation can only originate from chemical ligand detachment implying that the transition state of this step is indeed overestimated in the calculations of Ref. 32 by 1-2 kcal/mol.

## S4 Quantum mechanical (QM) calculations

### S4.1 Molecular model and electronic structure method

The energy and free energy for O<sub>2</sub> binding, reaction **1**→**2** in Figure 5 main text, were taken from our previous study,<sup>32</sup> where calculations were carried out using a QM(CA1-B3LYP)/QM(BP86-

D3) ONIOM approach. The functional in the high-level QM region (CA1-B3LYP) was a range-separated functional, that was specially parametrized to reproduce the binding energy profile of high-level ab-initio calculations. Whereas short-range dispersion interactions for O<sub>2</sub> binding were described with that functional, the medium and long-range dispersion interaction of O<sub>2</sub> with protein residues were accounted for by BP86-D3. The binding free energy reported in Ref. 32,  $\Delta G = -7.1$  kcal/mol, was for O<sub>2</sub> initially residing in the G cavity, i.e. active site of the protein. We have modified this value so that the binding free energy corresponds to O<sub>2</sub> initially residing in the gas phase at standard conditions, O<sub>2</sub> (g). This gives a binding free energy  $\Delta G = -2.7$  kcal/mol, as indicated in Figure 5 in the main text.

The calculations on the species formed upon consecutive addition of electrons and protons, **3-9** in Figure 5 main text, and on the species described in SI section 3, were carried out in this work using the large active site model shown in Figure S9. It is similar to the one used for the O<sub>2</sub> binding reaction and was obtained from the crystal structure of the *Cp* protein. This model was found to be sufficiently large for all reactions investigated. For one reaction, the formation of the sulphenic acid **9** (SOH) from species **4**, we investigated a slightly modified model. The sulphenic acid is strongly stabilised by a hydrogen bond to the CN<sup>-</sup> ligand, and we checked that this stabilization is not just an artifact of our model in which the cysteine residue is represented by a CH<sub>3</sub>SH molecule with the carbon atom fixed to the crystal structure position. Inclusion of the entire cysteine (with C<sup>α</sup> kept fixed to the crystal position) reduced only slightly the stabilisation of **9** relative to **4**, from 14 to 12 kcal/mol. Therefore our conclusion that **9** is an energetically low lying species remains unchanged.

We note that the N-atom of the bridging amino of the active site is thought to be involved in proton delivery to the active site. Therefore, under turnover conditions (H<sub>2</sub> production, no O<sub>2</sub> inhibition), this atom becomes temporarily doubly protonated. For our calculations we chose the singly protonated (neutral) state because our calculations indicated that proton transfer from the N-atom to bound O<sub>2</sub> is unlikely. The bound O<sub>2</sub> ligand is ideally positioned to accept a proton from Cys299, whereas proton transfer from the bridging N atom would require a major re-orientation

of O<sub>2</sub>, which is energetically costly and highly unlikely to occur. Thus, whereas proton transfer from the amine is important under turnover conditions, we do not think it plays a major role for the initial stages of O<sub>2</sub> reduction. For this reason we treated the N-atom as singly protonated (neutral), as was done also in earlier work by Reiher et. al. (e.g. in 33 or 34).

The electronic structure of the active site model is complicated by the [Fe<sub>4</sub>S<sub>4</sub>] unit, which consists of two high-spin Fe(II) and two high-spin Fe(III) atoms that are antiferromagnetically coupled to yield a total spin of 0. This electronic state was approximated with the broken symmetry approach<sup>35,36</sup> using a coupling scheme as described previously.<sup>32</sup> Geometry optimisations were performed with the BP86 functional<sup>37-41</sup> augmented with empirical dispersion corrections using Becke and Johnson damping<sup>42,43</sup> (denoted by +D3 suffix). Def2-TZVP basis set was used throughout the study.<sup>44,45</sup> The calculations were performed efficiently with the resolution of the identity (RI) approximation<sup>46,47</sup> using the def2-TZVP/J auxiliary basis set.<sup>48</sup> Single point energies reported in the manuscript were obtained with the B3LYP+D3 functional<sup>37,49,50</sup> (see section S4.3 for validation of this functional) and COSMO solvation model<sup>51</sup> with either  $\epsilon = 4$  to account for the charge screening in a protein environment or  $\epsilon = 78$  in case of an aqueous solution. Geometry optimisations were carried out using the default DFT integration grid m3, whereas single point calculations utilised a larger grid m4. All DFT computations were performed with the Turbomole package<sup>52</sup> if not stated otherwise.

Each calculation was checked for the final spin populations to reassure convergence to the same broken-symmetry state. In Table S3 we summarize the natural spin population analysis (NPA)<sup>53</sup> for the four iron atoms of the cubane for each species **1-9** shown in Figure 5, main text, as obtained with the B3LYP functional plus COSMO solvation model. For each species we obtained very similar spin populations showing that the calculations have indeed converged to the same broken-symmetry state.

All structures were subjected to analytical frequency calculations to confirm they correspond to stationary points and to obtain harmonic corrections for  $\Delta G$ . Because some atoms were fixed during optimisation, we obtained a few imaginary frequencies of small amplitude. They were ne-

Table S3: Natural spin population analysis for the four iron atoms of the cubane for each species **1-9** in Figure 5, main text, as obtained with B3LYP functional plus COSMO solvation model. The atom numbering is defined in Figure S9.

|          | Fe <sup>1</sup> | Fe <sup>2</sup> | Fe <sup>3</sup> | Fe <sup>4</sup> |
|----------|-----------------|-----------------|-----------------|-----------------|
| <b>1</b> | 3.457           | 3.449           | -3.302          | -3.319          |
| <b>2</b> | 3.445           | 3.441           | -3.288          | -3.327          |
| <b>3</b> | 3.457           | 3.433           | -3.293          | -3.328          |
| <b>4</b> | 3.427           | 3.451           | -3.285          | -3.324          |
| <b>5</b> | 3.480           | 3.430           | -3.275          | -3.327          |
| <b>6</b> | 3.386           | 3.358           | -3.181          | -3.217          |
| <b>7</b> | 3.385           | 3.463           | -3.259          | -3.296          |
| <b>8</b> | 3.457           | 3.449           | -3.302          | -3.319          |
| <b>9</b> | 3.437           | 3.457           | -3.291          | -3.319          |

glected in the calculation of thermochemical corrections. However, it was always verified that they do not involve any atoms important for the reaction studied. An alternative to omitting the imaginary frequencies is to remove from the Hessian all columns and rows that correspond to frozen atoms and calculate the free energy corrections from the eigenvalues of the modified Hessian. We have compared both methods for the two types of reactions considered in this work: (i) Reduction; we have chosen the reduction of the active site model [FeFe] (**1** in Figure 5, main text) as an example,  $[\text{FeFe}]^0 + 1 e^- \rightarrow [\text{FeFe}]^{1-}$ . We obtained a total correction for the Gibbs free energy of  $\Delta G_{corr} = -5.2$  kcal/mol when omitting all imaginary frequencies and  $\Delta G'_{corr} = -6.2$  kcal/mol when using the eigenvalues of the modified Hessian. (ii) Proton addition; we have chosen  $[\text{FeFe}]\text{-O}_2^{1-} + \text{H}^+ \rightarrow [\text{FeFe}]\text{OOH}$  as an example. Here both approaches give virtually identical free energy corrections of -6.9 kcal/mol after rounding the first decimal digit. This suggests that the free energies reported are robust against the free energy correction scheme used. We think that this is mainly due to the fact that the same atoms are frozen in each consecutive step of the reaction and that the active site model is large enough so that the local changes at the di-iron site hardly affect the frequencies associated with frozen atoms.

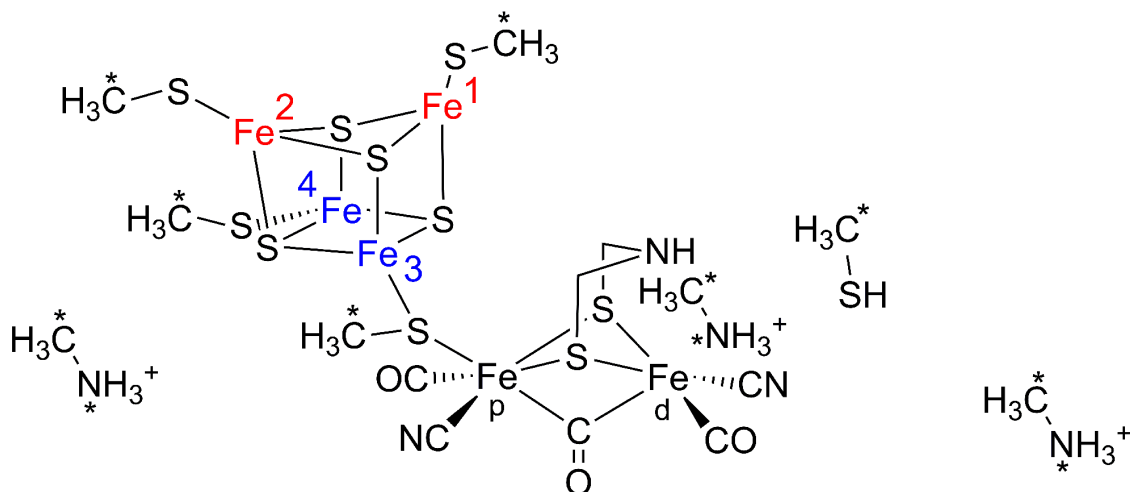

Figure S9: Scheme of the active site model used in this study. Atoms marked with asterisk were fixed to the crystal positions while the rest of the system was allowed to relax. The iron atoms 1 and 2 (red) as well as 3 and 4 (blue) are coupled ferromagnetically. The pairs (red-blue) are in turn coupled antiferromagnetically (see Table S3).

## S4.2 Calculation of reaction free energies for PT coupled ET

There are three types of reactions in the reaction scheme of Figure 5, main text. The first reaction is binding of  $O_2$  to the enzyme in state **1**

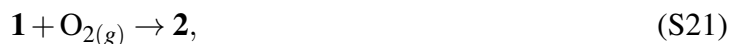

where (g) refers to the standard state in the gas phase and species **1** and **2** are in the solution phase at a standard activity of 1 mol/L. The electronic energies, zero-point energies, thermal corrections and entropic terms of **1** and **2** were calculated as explained in section S4.1 using the QM model of Figure S9 surrounded by a dielectric with  $\epsilon=4$ . The properties for  $O_2$  were calculated in the gas phase. The reaction energy difference ( $\Delta E$ ) and the free energy difference ( $\Delta G$ ) are summarized in Table S4. The difference between  $\Delta E$  and  $\Delta G$ , about 13 kcal/mol, is mainly due to the loss in translational entropy of the  $O_2$  molecule.

The second type of reactions are the ET/PT steps. Calculations of absolute electron or proton attachment energies in the condensed phase are challenging because of the change in total charge and the resulting dependence of these energies on the absolute potential in the simulation cell. The

Table S4: Summary of computed reaction energies and free energies for the reactions shown in Figure 5 of main text. In  $\mathbf{1} + \text{O}_2(\text{g}) \rightarrow \mathbf{2}$ ,  $\text{O}_2(\text{g})$  is at standard conditions. ET/PT steps are for pH=7 versus SHE.

|                                                                          | $\Delta E$ [kcal/mol] | $\Delta G$ [kcal/mol] |
|--------------------------------------------------------------------------|-----------------------|-----------------------|
| $\mathbf{1} + \text{O}_2(\text{g}) \rightarrow \mathbf{2}$               | -16.1                 | -2.7                  |
| $\mathbf{2} + \text{H}^+(\text{aq}) + \text{e}^- \rightarrow \mathbf{3}$ | -11.4                 | -6.2                  |
| $\mathbf{3} + \text{H}^+(\text{aq}) + \text{e}^- \rightarrow \mathbf{4}$ | -33.4                 | -34.9                 |
| $\mathbf{3} + \text{H}^+(\text{aq}) + \text{e}^- \rightarrow \mathbf{5}$ | 5.8                   | 8.6                   |
| $\mathbf{4} + \text{H}^+(\text{aq}) + \text{e}^- \rightarrow \mathbf{6}$ | -4.9                  | 0.7                   |
| $\mathbf{4} \rightarrow \mathbf{9}$                                      | -16.9                 | -14.0                 |
| $\mathbf{6} + \text{H}^+(\text{aq}) + \text{e}^- \rightarrow \mathbf{7}$ | -10.1                 | -12.9                 |
| $\mathbf{7} \rightarrow \mathbf{8}$                                      | -7.8                  | -13.3                 |
| Total*                                                                   | -82.7                 | -69.3                 |

\* $\text{O}_2 + 4\text{H}^+ + 4\text{e}^- \rightarrow 2\text{H}_2\text{O}$ .  
 Exp. +1.23 V at pH = 0 vs. SHE.  
 This is -74 kcal/mol at pH =7 vs. SHE.

latter differs from the potential in experimental set-ups due to the presence of interfaces in experiment, use of electron core potentials and/or boundary conditions for potentials in the calculations. We avoided this complication by considering only coupled ET/PT steps so that the system remains neutral in all considered states. To ease the comparison with experimental data, all free energy differences for the ET/PT steps in Figure 5 in the main text were calculated for pH 7 and are relative to the free energy of the standard hydrogen electrode (SHE) reaction.

For example, considering the first ET/PT reaction in Figure 5,

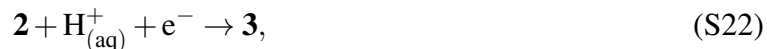

and the SHE reaction,

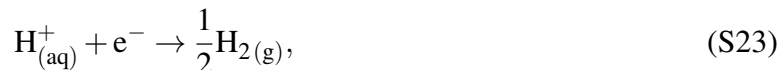

the standard reaction free energy of reaction Eq. S22 relative to the SHE reaction Eq. S23 is equal

to the standard reaction free energy  $\Delta G^0$  of the hydrogenation reaction (Eq. S22 minus Eq. S23),

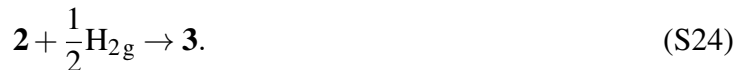

The electronic energy and free energy corrections for **2**, **3** and  $\text{H}_{2(\text{g})}$  are calculated as described in section S4.1 to obtain  $\Delta G^0$ . This way one obtains the standard reaction free energy of Eq. S22 vs SHE at a standard activity of  $\text{H}_{(\text{aq})}^+$  of 1 mol/l, i.e. at pH = 0. To obtain the reaction free energy at pH=7 vs SHE, we add the usual concentration term  $\ln 10 k_{\text{B}}T \text{ pH}$  to  $\Delta G^0$ , which amounts to an increase in  $\Delta G^0$  by 9.60 kcal/mol. Calculations are carried out similarly for the other ET/PT reactions shown in Figure 5.

The third type of reactions are unbinding events, e.g.

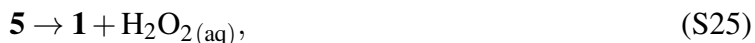

$\text{H}_2\text{O}_{2\text{aq}}$  is modelled as a cluster containing four explicit water molecules surrounded with a dielectric continuum. This gives a more accurate description of solvation than a pure dielectric continuum model. The reaction free energy reported corresponds then to the following reaction,

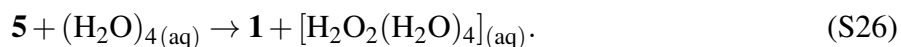

The electronic energies and free energy corrections of the species in reaction Eq. S26 are calculated as explained in section S4.1. Calculations are carried out similarly for unbinding of OOH, OH and water.

### S4.3 Validation of QM calculations

We have carried out extensive benchmark calculations to identify a density functional that would describe the oxygen reduction at the FeFe-hydrogenase active site with good accuracy. To this end we have carried out two series of calculations. Firstly, we chose a small test model of the



active site and calculated reaction energies for the first steps of oxygen reduction at the small active site model. The performance of several density functionals was compared to *ab initio* reference calculations at the level of the parametrized coupled cluster method with single and double excitations [pCCSD(-1,1)] using the def2-TZVP basis set (see Table S5). Secondly, we computed reduction and deprotonation free energies of oxygen species in aqueous solution and compared to experimental data (see Figure S10).

The small test model of the active site comprised of only the diiron subsite terminated with a CH<sub>3</sub>SH group (for the details see Ref. 32). We tested various functionals (BP86, TPSS,<sup>54</sup> B3LYP, PBE0,<sup>55,56</sup> BHLYP,<sup>37,38,40,50</sup> CAM-B3LYP<sup>57</sup> along with corresponding D3 correction against pCCSD(-1,1).<sup>58</sup> The special parametrization accounts partially for missing higher-order excitations and improves the results substantially. The calculations would be prohibitively expensive without recently developed local pair natural orbital approach (LPNO)<sup>59</sup> that greatly reduces the virtual excitation space but provides results that are typically within  $\pm 1$  kcal/mol of the canonical calculations. We note, that particularly LPNO-pCCSD is both efficient and accurate method that approaches CCSD(T) accuracy at a fraction of cost.<sup>60</sup> The structures were optimised using setup described in the section S4.1. Calculations were performed with the Turbomole package, except the CAM-B3LYP and reference LPNO-pCCSD computations, which were carried out with the ORCA 3.0.3 program.<sup>61</sup> In case of the LPNO-pCCSD the  $T_1$  diagnostic was found to be always between 0.022 and 0.026 in calculations involving the [2Fe] subunit and 0.014 for a free triplet oxygen molecule. The general agreement is that CC calculations that show  $T_1 < 0.04$  can be considered as reliable.<sup>62</sup> The results are summarized in Table S5. We found that the B3LYP functional shows best overall performance with a mean unsigned error (MUE) of 2.31 kcal/mol and relative unsigned error (MRUE) of 8%, closely followed by the range-separated version of the same functional, CAM-B3LYP.

Table S5: Comparison of the electronic energy changes (kcal/mol) for eight reactions involving a small diiron model of [FeFe] hydrogenase active site adopted from 32. At the bottom of the table statistical evaluation of the density functionals with respect to the reference LPNO-pCCSD calculations is provided (MUE: mean unsigned error, MRUE: mean relative unsigned error, RMSD: root mean square deviation, MAX( $\pm$ ): maximum signed positive or negative error). All calculations utilize the def2-TZVP basis set.

| Reaction                                                                                           | BP86    | TPSS    | B3LYP   | PBE0    | BHLYP   | CAM-B3LYP | LPNO-pCCSD |
|----------------------------------------------------------------------------------------------------|---------|---------|---------|---------|---------|-----------|------------|
| $[\text{FeFe}]^{1-} + 1e^- \rightarrow [\text{FeFe}]^{2-}$                                         | 11.60   | 16.95   | 22.74   | 26.34   | 45.49   | 25.12     | 21.55      |
| $[\text{FeFe}]^{1-} - 1e^- \rightarrow [\text{FeFe}]^0$                                            | 75.30   | 72.03   | 75.51   | 77.57   | 74.33   | 73.03     | 74.19      |
| $[\text{FeFe}]^{1-} + \text{O}_2 \rightarrow [\text{FeFe}] - \text{O}_2^{1-}$                      | -9.84   | -11.47  | -2.11   | -0.58   | 10.36   | -2.52     | -1.93      |
| $[\text{FeFe}]^{2-} + \text{O}_2 \rightarrow [\text{FeFe}] - \text{O}_2^{2-}$                      | 4.41    | 3.06    | 15.01   | 18.96   | 13.69   | 7.57      | 11.62      |
| $[\text{FeFe}] - \text{O}_2^{1-} + 1e^- \rightarrow [\text{FeFe}] - \text{O}_2^{2-}$               | 25.84   | 31.48   | 39.86   | 45.88   | 48.83   | 35.22     | 35.11      |
| $[\text{FeFe}] - \text{O}_2^{1-} + \text{H}^+ \rightarrow [\text{FeFe}] - \text{O}_2\text{H}$      | -309.20 | -311.72 | -311.51 | -312.02 | -316.93 | -309.27   | -315.00    |
| $[\text{FeFe}] - \text{O}_2^{2-} + \text{H}^+ \rightarrow [\text{FeFe}] - \text{O}_2\text{H}^{1-}$ | -415.17 | -420.37 | -429.99 | -436.83 | -445.21 | -427.78   | -431.46    |
| $[\text{FeFe}] - \text{O}_2\text{H} + 1e^- \rightarrow [\text{FeFe}] - \text{O}_2\text{H}^{1-}$    | -80.13  | -77.16  | -78.63  | -78.93  | -79.45  | -83.28    | -81.35     |
| MUE [kcal/mol]                                                                                     | 7.35    | 5.88    | 2.31    | 4.80    | 8.72    | 2.60      |            |
| MAX(+) [kcal/mol]                                                                                  | 16.29   | 11.09   | 4.75    | 10.77   | 23.94   | 5.72      |            |
| MAX(-) [kcal/mol]                                                                                  | -9.96   | -9.54   | -0.18   | -5.37   | -13.75  | -4.05     |            |
| RMSD [kcal/mol]                                                                                    | 8.67    | 6.66    | 2.72    | 5.59    | 11.79   | 3.18      |            |
| MRUE [%]                                                                                           | 69.09   | 76.40   | 8.00    | 24.48   | 101.35  | 11.14     |            |

Next, the performance of the microsolvation model used for calculation of the free energies of species **3** – **9** was tested against experimental deprotonation and reduction free energies of oxygen species in water, see Figure S10. Each oxygen species was solvated with 4 explicit water molecules and the cluster surrounded by the COSMO dielectric continuum (as described previously for **3** – **9** in section S4.2). The DFT functional is B3LYP+D3. Electronic energy and free energy corrections were calculated as explained in section S4.1. The free energy of the solvated proton, which has a transient structure (fluctuating defect), was not calculated explicitly but left as a fit parameter to align the computed deprotonation free energies to the experimental scale. For reduction reactions the reaction free energy was calculated for pH=7 vs SHE.

We found excellent agreement between computed and experimental free energies ( $R^2 > 0.99$ ). The errors in potentials for the stepwise reduction of oxygen to water are reasonably small, in the order of 0.3 V (see table S7). Results are also given for a model where only the COSMO continuum solvation model is used, without explicit water molecules (column COSMO only). In this case errors are very large which shows that inclusion of explicit water molecules is essential. Hence, we conclude that the B3LYP+D3 functional in combination with our microsolvation model performs very well for both sets of calculations, reduction of O<sub>2</sub> at the di-iron active site and in aqueous solution. This approach was therefore chosen for the calculations presented in the main text.

The microsolvation model used was additionally validated by comparing the computed hydration free energies to experiment. The results are summarized in Table S6, where we also give the results for the COSMO only model, without explicit water molecules. On the basis of these data it is clear that an adequate description of solvation of charged species such as OH<sup>-</sup> and O<sub>2</sub><sup>-</sup> can only be achieved if the first hydration shell is treated explicitly as done in our microsolvation model. Similar results have been reported before in the literature by Truhlar and co-workers for redox potential calculation of aqueous ions<sup>63</sup> and pKa calculations.<sup>64</sup> The inclusion of explicit water seems to be less crucial for the solvation free energy of neutral species, which is already reasonably well described by COSMO only. Unfortunately, we could not find an experimental value for H<sub>2</sub>O<sub>2</sub>,

which is why this species is not included in the table.

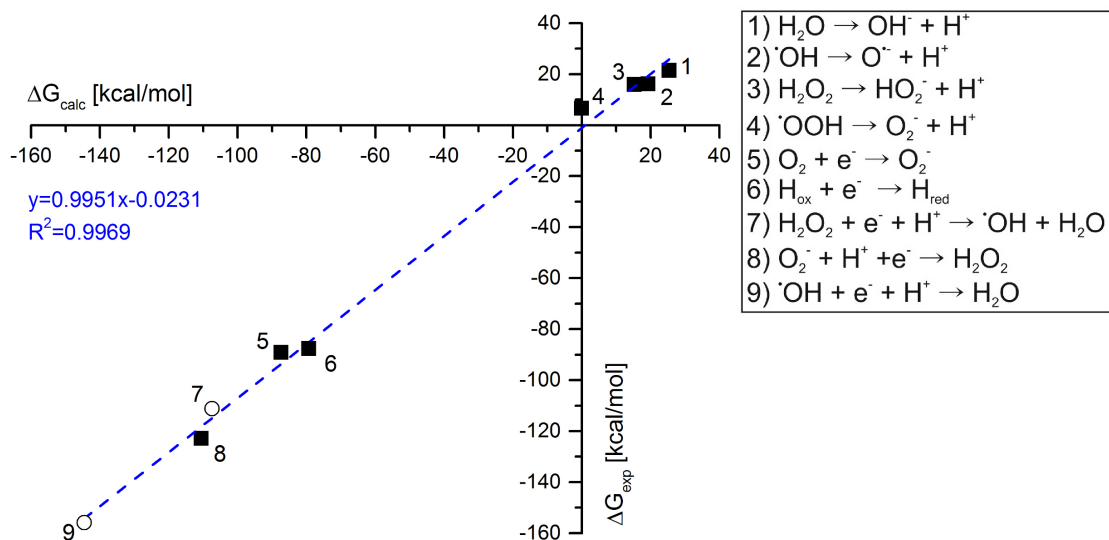

Figure S10: Correlation between experimental<sup>65–67</sup> and calculated reaction free energies for deprotonation and reduction reactions of oxygen species.  $\text{H}_{\text{ox}}$  and  $\text{H}_{\text{red}}$  denote oxidized (Fe(II)Fe(I)) and reduced form ((Fe(I)Fe(I)) of the active site model, respectively. Reactions denoted by a filled square are used for the fit of  $\text{H}^+$  solvation free energy.

Table S6: Summary of experimental and computed solvation free energies,  $\text{X}_{(g)} \rightarrow \text{X}_{(aq)}$  at standard conditions,  $\text{X}=\text{H}_2\text{O}, \text{OH}^-, \text{O}_2^-$ . Calculations were carried out without explicit water molecules and COSMO continuum solvation model only or with a microsolvation model where 4 water molecules are explicitly included and the remaining solvation shells modelled with a COSMO continuum solvation model. MUE denotes the mean unsigned error of the method with respect to the experimental values. All values in units of kcal/mol.

| Molecule                           | Exp.             | Only COSMO | Microsolvation |
|------------------------------------|------------------|------------|----------------|
| $\text{H}_2\text{O}$ <sup>68</sup> | $-6.3 \pm 0.4$   | -9.9       | -5.1           |
| $\text{OH}^-$ <sup>69</sup>        | $-106.4 \pm 0.5$ | -68.9      | -107.8         |
| $\text{O}_2^-$ <sup>65</sup>       | -85.0            | -57.3      | -86.0          |
|                                    | MUE              | 22.9       | 1.2            |

Table S7: Comparison of the calculated and experimental<sup>66,67</sup> reduction potentials w.r.t SHE at pH=7 for set of reactions involving oxygen species (see Figure S10). The calculations employ B3LYP+D3 functional with COSMO or microsolvation models denoted as  $E_{calc}^{COSMO}$  or  $E_{calc}^{microsolv.}$ , respectively. MUE denotes the mean unsigned error of the method with respect to the experimental values.

| Reaction | $E_{calc}^{COSMO}$ [V] | $E_{calc}^{microsolv.}$ [V] | $E_{exp}$ [V] |
|----------|------------------------|-----------------------------|---------------|
| 5        | -1.53                  | -0.27                       | -0.33         |
| 6        | -0.62                  | -0.62                       | -0.40         |
| 7        | -0.86                  | 0.32                        | 0.89          |
| 8        | -0.99                  | 0.19                        | 0.38          |
| 9        | 0.65                   | 1.80                        | 2.32          |
| MUE [V]  | 1.24                   | 0.31                        | –             |

## S5 Caption of fig 2 and the site-directed mutants of Cr FeFe hydrogenase

### S5.1 Caption of fig 2

A: Effect of H/D exchange on the inhibition of WT Ca FeFe hydrogenase by O<sub>2</sub>. pH or pD = 7.1,  $E = 90$  mV vs SHE,  $T = 12^\circ$  C, 1 bar H<sub>2</sub> or D<sub>2</sub>. (Experiment with H<sub>2</sub> oxidation in H<sub>2</sub>O, [O<sub>2</sub>]<sub>0</sub> = 6.25 μM,  $\tau = 49$  s; 12.5 μM, 50 s; 25 μM, 53 s; experiment with D<sub>2</sub> oxidation in D<sub>2</sub>O, [O<sub>2</sub>]<sub>0</sub> = 6.25 μM,  $\tau = 43$  s; 12.5 μM, 40 s; 25 μM, 37 s).

B: Effect of pH on the inhibition of WT Ca FeFe hydrogenase by O<sub>2</sub>. pH = 6, 7 and 8.5,  $E = 190$  mV,  $T = 12^\circ$ C, [O<sub>2</sub>]<sub>0</sub> = 12.5 and 25 μM,  $\tau = 38$  and 39 s at pH 6; 39 and 36 s at pH 7; 25 and 25 s at pH 8.5.

C: Effect of electrode potential on the inhibition of WT Ca FeFe hydrogenase by O<sub>2</sub>. pH = 6,  $E = 40$  and 140 mV,  $T = 12^\circ$ C, [O<sub>2</sub>]<sub>0</sub> = 6.25, 12.5 and 25 μM,  $\tau = 35$ , 34 and 35 s at 40 mV;  $\tau = 33$ , 32 and 33 s at 140mV.

D: Effect of F290Y and V296F substitutions on the inhibition of Cr FeFe hydrogenase by CO. pH = 7,  $E = 190$  mV,  $T = 30^\circ$  C, [CO]<sub>0</sub> = 4.8 μM,  $\tau = 19$  s (WT), 17 s (V296F) and 19 s (F234Y).

E: Effect of F290Y and V296F substitutions on the inhibition of Cr FeFe hydrogenase by O<sub>2</sub>. pH = 7,  $E = 40$  mV,  $T = 12^\circ$  C, [O<sub>2</sub>]<sub>0</sub> = 12.5 μM,  $\tau = 38$  s (WT), 20 s (V296F) and 41 s (F234Y). The inset in panel E shows the data in a plot of  $-d(\log(i))/dt$  against the time after the injection of O<sub>2</sub>. As explained in ref 54, this gives the instant rate constant of inactivation (provided the reaction is irreversible, which is only true just after the time of injection of O<sub>2</sub>). The inset therefore shows that the F290Y mutant reacts with O<sub>2</sub> about twice as slowly as the WT enzyme.

F: Effect of C169D substitution on the inhibition of Cr FeFe hydrogenase by O<sub>2</sub>. pH = 7,  $E = 40$  mV,  $T = 3^\circ$ C, [O<sub>2</sub>]<sub>0</sub> = 25 μM,  $\tau = 45$  s for Cr WT and 49 s for Cr C169D. E: Cr WT and Cr V296F, pH = 7, 1 bar H<sub>2</sub>,  $\omega = 3$  krpm,  $E = -158$  mV,  $T = 30^\circ$ C, [CO]<sub>0</sub> = 2.4 μM,  $\tau = 20$  s for Cr WT and 17.5 s for Cr V296F.

## S5.2 The site-directed mutants

Site-directed mutagenesis was performed on the CrhydA1 gene cloned into the pBBR-hydA1N vector<sup>70</sup> using Quick Change Site-Directed Mutagenesis Kit (Agilent Technologies, Santa Clara, CA, USA). The recombinant plasmids were introduced and expressed in *Shewanella oneidensis* AS52 strain as described in ref. 70.

### S5.2.1 C169D

The mutagenesis primers used for creating C169D mutant were T226Kup 5'-ccatgttcaccagcgatt-tgccccggctgga-3'.

The analysis of the C169D data recorded at pH 7,  $E = 40$  mV,  $T = 12^\circ\text{C}$  (ref 71 and fig S11) returns:  $k_i = 2.5 \pm 0.5 \text{ mM}^{-1}\text{s}^{-1}$  (WT) and  $3.8 \pm 0.4 \text{ mM}^{-1}\text{s}^{-1}$  (C169D);  $k_a = 0.035 \pm 0.005 \text{ s}^{-1}$  (WT) and  $0.010 \pm 0.001 \text{ s}^{-1}$  (C169D),  $k_3 = 0.024 \pm 0.003 \text{ s}^{-1}$  (WT) and  $0.0021 \pm 0.0008 \text{ s}^{-1}$  (C169D).

### S5.2.2 V296F

For the V296F mutant the primers were Hyd1-830Fw 5'-TGACCGCGACTGGTTCTGTGTGGACG-3' and Hyd1V296Frev 5'-GCGCAGTGCCGCCTCCAT**GAA**ACCTCCGGTGGTGCCGAACAG-3' (with nucleotide triplets coding a mutated amino acid shown in bold, and underlined are silent base changes to lower secondary structure formation). The PCR program used was  $96^\circ\text{C}$  5 min, [ $96^\circ\text{C}$  1 min,  $65^\circ\text{C}$  3 sec,  $72^\circ\text{C}$  17 min] for 25 cycles, and a final cycle at  $72^\circ\text{C}$  17 min. The PCR products were digested with DpnI and directly transformed into *E. coli*, and clones were sequenced to confirm the mutation.

Figure S12 shows experiments in which films of WT Cr and V286F were exposed to series of potential steps (as shown in the upper panel), and their current response (bottom). Following each step, the equilibrium between active and anaerobically inactivated species changes, which results in a multiexponential relaxation towards a new steady-state. We analyzed the transients in detail to gain insight in the inactivation process in ref. 72. The difference between the WT and the

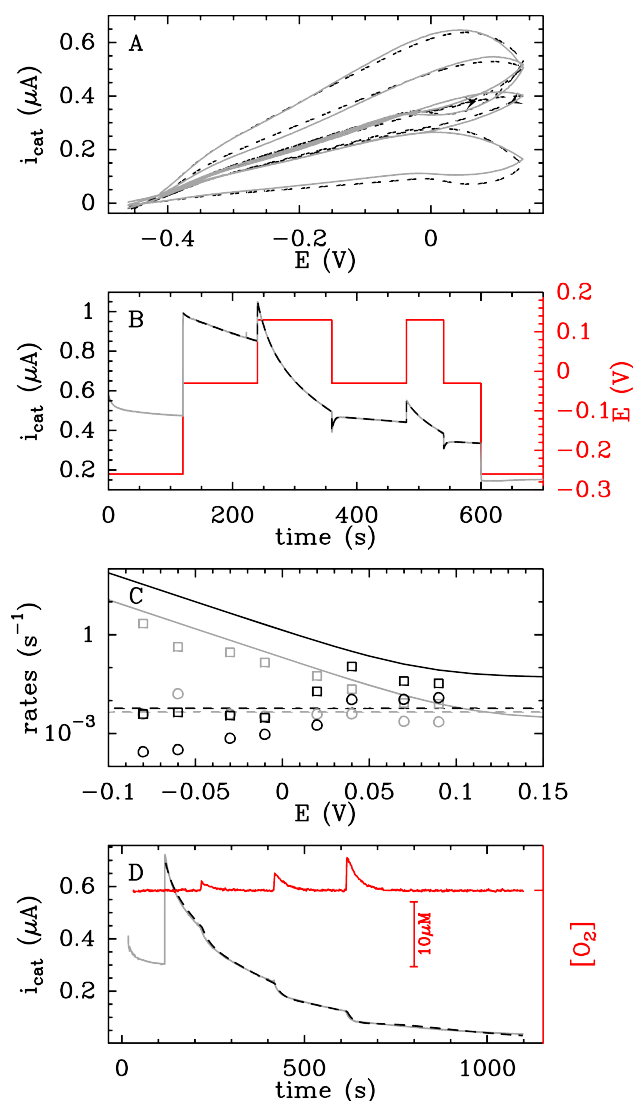

Figure S11: Characterization of the anaerobic / aerobic inactivation of C169D Cr hydrogenase grafted on rotating electrode,  $T = 12^{\circ}\text{C}$ ,  $\text{pH} = 7$ ,  $\omega = 3000$  rpm, 1 bar  $\text{H}_2$ . A: Cyclic voltammograms at different scan rates (5, 10, 20 and 2 mV/s; gray lines) and fits (dashed black lines). B: Current response of  $\text{H}_2$ -oxidation (gray line) and fit (black dashed line) for a sequence of potential steps applied to the electrode (red line). C: Potential dependence of the rate constants for the anaerobic inactivation, extracted from fits shown on panels A ( $k_a$ : plain lines and  $k_i$ : dashed lines) and B ( $k_a$ : square dots and  $k_i$ : circle dots). The rate constants for two species involved in the kinetic model are distinguished using black and gray plots. D: Catalytic current of  $\text{H}_2$ -oxidation changes with enzyme exposure to  $\text{O}_2$  (gray line),  $E = 40$  mV;  $[\text{O}_2]_0 = 1.25 \mu\text{M}$ ,  $\tau = 31$  s;  $2.5 \mu\text{M}$ , 30 s;  $5 \mu\text{M}$ , 30 s. The oxygen reduction current is plot against time as a red line,  $E = -560$  mV;  $\omega = 6000$  rpm.

V296F is most visible in the steps at  $\approx 0.05$  V at  $t = 150$  s and 350 s: whereas the WT enzyme quickly inactivates or activates (and then irreversibly inactivates), the inactivation/activation of the V296F mutant is very slow (neither are complete in these steps). Surprisingly, the rate of inactivation/reactivation is slower at 0.05 V than at 0.15 V. This is not compatible with the model that explains the data in the WT enzyme, for which the relaxation rate increases when the potential is decreased. This shows that the chemistry of the anaerobic inactivation in the V296F mutant is not the same as that in the WT enzyme, which suggests that the aerobic inactivation may be different too. Hence, the difference in  $\text{O}_2$  reaction rate between the WT and the V296F (main text fig 2E) cannot be interpreted only in terms of kinetics of diffusion along the gas channel.



Figure S12: Anaerobic (in)activation of WT and V296F Cr FeFe hydrogenase.

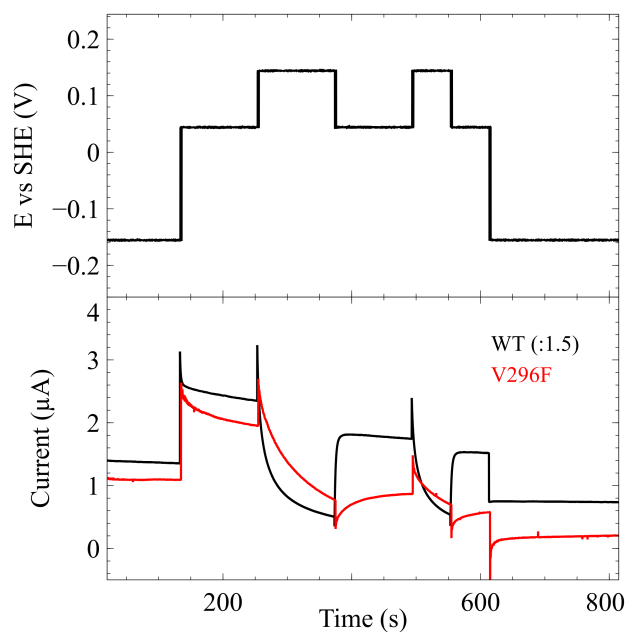

### S5.2.3 F290Y

The construction and partial characterization of the F290Y mutant are described in ref 72, although this mutant was mistakenly called F234Y therein.

### S5.2.4 F290W

The mutagenesis primers used for creating the F290W mutant were Hyd1-830Fw 5'- TGACCGCGA-CTGGTTCTGTGTGGACG-3' and Hyd1F290Wrev 5'- CTCCATGACACCGCCAGTGGTGCC-CCACAGCACGCCTGCGCCCGAG -3', (with nucleotide triplets coding a mutated amino acid shown in bold, and underlined are silent base changes to lower secondary structure formation).

# S6 XYZ coordinates of computed structures, Fig. 5 main text

|         |             |            |            |            |            |            |            |            |             |            |            |
|---------|-------------|------------|------------|------------|------------|------------|------------|------------|-------------|------------|------------|
| State 1 |             |            | S          | 5.0938211  | 27.5352706 | 27.0376919 | H          | 3.4131994  | 32.9194177  | 27.5900988 |            |
| 80      |             |            | C          | 0.7216845  | 27.0683127 | 26.3273091 | H          | -0.5242460 | 33.0791724  | 30.6414001 |            |
|         |             |            | N          | -0.3211679 | 27.0832559 | 27.3886311 | H          | -2.2712146 | 33.4800838  | 30.7037496 |            |
| C       | 2.8858334   | 33.3821088 | 28.4303703 | H          | 4.4141355  | 29.5698979 | 25.8466137 | H          | 0.1422184   | 30.7289758 | 30.9942252 |
| S       | 1.6505058   | 32.1597973 | 29.0114418 | H          | 5.3231497  | 28.4372666 | 24.8081890 | H          | -1.1735557  | 29.5242747 | 31.2087096 |
| Fe      | 0.1734620   | 31.5501570 | 27.3448925 | H          | 1.7144455  | 27.1570108 | 26.7814153 | C          | -9.4623550  | 19.8487551 | 23.3205802 |
| Fe      | -2.2501140  | 30.8211592 | 27.1631377 | H          | 0.5425499  | 27.9231298 | 25.6683818 | N          | -8.9887849  | 19.8461818 | 21.8832419 |
| C       | -2.6696533  | 29.0472011 | 26.6944106 | H          | -0.2366122 | 27.9526351 | 27.9929626 | H          | -8.8684179  | 19.1152766 | 23.8742576 |
| N       | -2.7762916  | 27.8864933 | 26.4937650 | H          | -1.3184127 | 27.1774516 | 26.9868091 | H          | -10.5225148 | 19.5779668 | 23.3284788 |
| C       | 0.6660615   | 33.0439297 | 26.2920597 | C          | 9.0870818  | 25.2234985 | 20.2240736 | H          | -7.9698163  | 20.1030960 | 21.8190919 |
| N       | 1.0099502   | 33.9762706 | 25.6679402 | N          | 10.5874728 | 25.3921132 | 20.1158233 | H          | -9.1092494  | 18.8937654 | 21.4452606 |
| C       | -1.6726493  | 32.7772929 | 29.9511966 | H          | -0.2484676 | 26.2728850 | 28.0107618 | H          | -9.5315965  | 20.5377961 | 21.3037689 |
| S       | -1.6508144  | 32.8321548 | 28.0783278 | H          | 8.7082331  | 25.9803648 | 20.9173042 | C          | -4.7072237  | 27.7904542 | 30.1710166 |
| C       | -0.9782849  | 30.5044836 | 30.4237514 | H          | 8.6576866  | 25.3608151 | 19.2270023 | S          | -4.7860706  | 29.0652508 | 31.4781495 |
| S       | -0.7650168  | 29.8991147 | 28.6498285 | H          | 11.0023684 | 24.6821872 | 19.4567481 | C          | 0.2291980   | 27.1926574 | 32.5064788 |
| C       | 1.4086597   | 30.6026160 | 26.5732433 | H          | 10.8383811 | 26.3473324 | 19.7565491 | S          | 1.9725905   | 26.6543176 | 32.3374464 |
| O       | 2.2310410   | 30.0187186 | 25.9916107 | H          | 11.0507230 | 25.2709860 | 21.0504976 | C          | 6.9139297   | 31.4752476 | 32.9484591 |
| C       | -3.4748560  | 31.5965561 | 26.1689105 | Fe         | 2.9302030  | 30.4685704 | 29.8416921 | S          | 6.6681934   | 29.6911397 | 32.6235581 |
| O       | -4.2909424  | 32.1125816 | 25.5220737 | Fe         | 4.3415271  | 28.4395799 | 28.8851936 | H          | -5.2474443  | 30.0454750 | 30.6538360 |
| C       | -0.9485221  | 30.9446056 | 25.7942629 | S          | 5.0620559  | 30.5567069 | 29.1540051 | H          | -4.0738865  | 28.1293441 | 29.3436279 |
| O       | -0.8097855  | 30.7267767 | 24.6443231 | S          | 2.1005312  | 28.5064738 | 29.1397422 | H          | -5.7096732  | 27.5483597 | 29.7997988 |
| N       | -1.9405438  | 31.5319373 | 30.6115553 | H          | -0.2097949 | 27.2673035 | 31.5027349 | H          | 0.1751970   | 28.1253366 | 33.0809649 |
| H       | -2.8838290  | 31.1760963 | 30.4267139 | H          | -4.0316849 | 27.1637136 | 30.7663397 | H          | -0.3165881  | 26.4062887 | 33.0441802 |
| H       | 2.3374527   | 34.2351996 | 28.0176129 | H          | -9.2780152 | 20.8808871 | 23.6327980 | H          | 7.0330272   | 32.0344077 | 32.0124893 |
| H       | 3.5131265   | 32.9425967 | 27.6481550 | H          | 8.8849174  | 24.2167167 | 20.6007240 | H          | 7.8244250   | 31.5816373 | 33.5527366 |
| H       | -0.6816747  | 33.1445902 | 30.2567916 | H          | 6.1925987  | 29.4449165 | 26.0124723 | Fe         | 2.9235204   | 28.1525108 | 31.0675270 |
| H       | -2.4353111  | 33.5126656 | 30.2342250 | H          | 6.3500249  | 31.6819857 | 33.8671499 | Fe         | 5.0256234   | 29.5818382 | 31.1924510 |
| H       | 0.0162866   | 30.8374414 | 30.7504531 | H          | 0.6392148  | 26.1376942 | 25.7557892 | S          | 4.9739647   | 27.3959906 | 30.7471605 |
| H       | -1.2686988  | 29.6073861 | 30.9830858 | H          | 3.4992289  | 33.6735061 | 29.2907136 | S          | 3.0490016   | 30.1247760 | 32.0765474 |
| C       | -9.4623550  | 19.8487551 | 23.3205802 |            |            |            |            | C          | 5.2682754   | 28.8894859 | 25.8077522 |
| N       | -9.0294116  | 19.7113824 | 21.8767463 | State 2    |            |            |            | S          | 5.2206149   | 27.5717381 | 27.0866471 |
| H       | -8.8712985  | 19.1490683 | 23.9192259 | 82         |            |            |            | C          | 0.7216845   | 27.0683127 | 26.3273091 |
| H       | -10.5278967 | 19.6064351 | 23.3787934 |            |            |            |            | N          | -0.3142711  | 27.1233552 | 27.3922337 |
| H       | -8.0061822  | 19.9347739 | 21.7645665 | C          | 2.8858334  | 33.3821088 | 28.4303703 | H          | 4.2884236   | 29.3617300 | 25.6932792 |
| H       | -9.1857756  | 18.7281284 | 21.5256844 | S          | 1.6864124  | 32.2088114 | 29.1592025 | H          | 5.5664279   | 28.4251741 | 24.8582105 |
| H       | -9.5721755  | 20.3659848 | 21.2545947 | Fe         | 0.1063307  | 31.5905805 | 27.5659632 | H          | 1.7209380   | 27.0278518 | 26.7753826 |
| C       | -4.7072237  | 27.7904542 | 30.1710166 | Fe         | -2.3641944 | 30.9368312 | 27.6039728 | H          | 0.6328112   | 27.9761561 | 25.7240342 |
| S       | -4.7447636  | 29.4185366 | 30.9981489 | C          | -2.6273356 | 29.2150732 | 26.8646608 | H          | -0.1508833  | 27.9317303 | 28.0478325 |
| C       | 0.2291980   | 27.1926574 | 32.5064788 | N          | -2.6392689 | 28.0964517 | 26.4910395 | H          | -1.3073647  | 27.3375468 | 26.9810736 |
| S       | 1.9984643   | 26.7232696 | 32.4154416 | C          | 0.5476593  | 33.1182181 | 26.5261582 | C          | 9.0870818   | 25.2234985 | 20.2240736 |
| C       | 6.9139297   | 31.4752476 | 32.9484591 | N          | 0.8434054  | 34.0552383 | 25.8866336 | N          | 10.5757820  | 25.4940351 | 20.2553162 |
| S       | 6.7267475   | 29.7104495 | 32.4930716 | C          | -1.5332732 | 32.7458178 | 30.3588026 | H          | -0.3275415  | 26.2718357 | 27.9609292 |
| H       | -5.5334749  | 30.0405294 | 30.0923016 | S          | -1.5915494 | 32.9033159 | 28.4880106 | H          | 8.5980936   | 25.9341428 | 20.8971169 |
| H       | -4.3068889  | 27.8779338 | 29.1537514 | C          | -0.8733889 | 30.4401707 | 30.6879937 | H          | 8.7395205   | 25.3588854 | 19.1954643 |
| H       | -5.7021209  | 27.3304321 | 30.1610429 | S          | -0.7391939 | 29.9098904 | 28.8796569 | H          | 11.0952423  | 24.8315329 | 19.6212216 |
| H       | 0.1172186   | 28.1568155 | 33.0181576 | C          | 1.3399349  | 30.6708016 | 26.7393393 | H          | 10.7903393  | 26.4737845 | 19.9402297 |
| H       | -0.2994722  | 26.4176022 | 33.0779012 | O          | 2.1543807  | 30.1262692 | 26.1138714 | H          | 10.9620786  | 25.3787585 | 21.2253317 |
| H       | 6.5566324   | 32.1368047 | 32.1498033 | C          | -3.4432708 | 31.7957293 | 26.4089778 | Fe         | 2.9581659   | 30.4557156 | 29.8940592 |
| H       | 7.9804345   | 31.6734269 | 33.1232625 | O          | -4.1386590 | 32.3442834 | 25.7495049 | Fe         | 4.4084970   | 28.4595366 | 28.9151718 |
| Fe      | 2.9225888   | 28.1984342 | 31.0915289 | C          | -0.9940885 | 31.1226829 | 26.0890838 | S          | 5.1028560   | 30.5751185 | 29.2642728 |
| Fe      | 5.0331887   | 29.6205928 | 31.1144447 | O          | -1.0190737 | 30.9469278 | 24.9298886 | S          | 2.1651652   | 28.5180784 | 29.0978349 |
| S       | 4.9576976   | 27.4186232 | 30.7272787 | N          | -1.8065579 | 31.4746211 | 30.9555110 | H          | -0.2341871  | 27.3470849 | 31.5235667 |
| S       | 3.0841105   | 30.2084471 | 32.0373961 | H          | -2.7630211 | 31.1537136 | 30.7852050 | H          | -4.2682378  | 26.8952829 | 30.6284862 |
| C       | 5.2682754   | 28.8894859 | 25.8077522 | H          | 2.3265593  | 34.2522417 | 28.0732042 | H          | -9.3140251  | 20.8546642 | 23.7249822 |

|         |             |            |            |         |            |            |            |    |             |            |            |
|---------|-------------|------------|------------|---------|------------|------------|------------|----|-------------|------------|------------|
| H       | 8.9223950   | 24.1950401 | 20.5592211 | H       | 7.9842937  | 31.7038875 | 33.0368203 | C  | -3.6251000  | 32.0828099 | 26.5766297 |
| H       | 6.0063900   | 29.6492368 | 26.0917168 | Fe      | 2.9359102  | 28.1717258 | 31.0962103 | O  | -4.4467131  | 32.6556092 | 26.0034744 |
| H       | 6.0607513   | 31.8794700 | 33.5071886 | Fe      | 5.0538047  | 29.5918219 | 31.1345746 | C  | -1.0535589  | 31.8248941 | 25.9243153 |
| H       | 0.5408241   | 26.1907915 | 25.6974296 | S       | 4.9711312  | 27.3960492 | 30.7320106 | O  | -1.1917141  | 31.9310073 | 24.7699361 |
| H       | 3.5967088   | 33.6559308 | 29.2187837 | S       | 3.1104278  | 30.1676688 | 32.0602350 | N  | -1.8288036  | 31.4734871 | 30.8058570 |
| O       | -3.7426530  | 30.6094896 | 28.8615781 | C       | 5.2682754  | 28.8894859 | 25.8077522 | H  | -2.7658168  | 31.1724110 | 30.5113185 |
| O       | -4.9959897  | 30.9240888 | 28.6921183 | S       | 5.1099119  | 27.5367744 | 27.0415858 | H  | 2.4067028   | 34.3282768 | 28.1632084 |
|         |             |            |            | C       | 0.7216845  | 27.0683127 | 26.3273091 | H  | 3.3555827   | 32.9500495 | 27.5408910 |
| State 3 |             |            |            | N       | -0.3373872 | 27.1585314 | 27.3690725 | H  | -0.5436374  | 33.1044582 | 30.6477187 |
| 83      |             |            |            | H       | 4.4151922  | 29.5710709 | 25.8597741 | H  | -2.2929217  | 33.4983451 | 30.7602788 |
|         |             |            |            | H       | 5.3107842  | 28.4368684 | 24.8080605 | H  | 0.1397369   | 30.7786896 | 30.7909884 |
| C       | 2.8858334   | 33.3821088 | 28.4303703 | H       | 1.7099981  | 27.0429979 | 26.8006316 | H  | -1.1546895  | 29.5145083 | 30.8615124 |
| S       | 1.6839330   | 32.1915613 | 29.1204974 | H       | 0.6486380  | 27.9564427 | 25.6936637 | C  | -9.4623523  | 19.8487495 | 23.3205737 |
| Fe      | 0.1615418   | 31.5841835 | 27.5098154 | H       | -0.1899686 | 27.9888992 | 28.0060367 | N  | -9.3655791  | 20.2047477 | 21.8525711 |
| Fe      | -2.2841594  | 30.9991639 | 27.4227415 | H       | -1.3188740 | 27.3500840 | 26.9478069 | H  | -8.7293859  | 19.0630602 | 23.5272904 |
| C       | -2.6208814  | 29.2585965 | 26.7671394 | C       | 9.0870818  | 25.2234985 | 20.2240736 | H  | -10.4791885 | 19.4950998 | 23.5166741 |
| N       | -2.7071014  | 28.1206431 | 26.4633249 | N       | 10.5828438 | 25.4270536 | 20.1190367 | H  | -8.4028951  | 20.5534825 | 21.6091631 |
| C       | 0.6541428   | 33.0641984 | 26.4225397 | H       | -0.3571533 | 26.3270432 | 27.9666882 | H  | -9.5676387  | 19.3658131 | 21.2444598 |
| N       | 0.9840503   | 33.9765998 | 25.7642700 | H       | 8.6905332  | 25.9693956 | 20.9195466 | H  | -10.0539353 | 20.9593803 | 21.5984747 |
| C       | -1.5838998  | 32.8257646 | 30.1893120 | H       | 8.6556449  | 25.3528350 | 19.2268883 | C  | -4.7072224  | 27.7904464 | 30.1710081 |
| S       | -1.5182590  | 32.9584601 | 28.3231907 | H       | 11.0144509 | 24.7296509 | 19.4576721 | S  | -2.9449890  | 27.8252796 | 29.6701643 |
| C       | -1.0143322  | 30.5071301 | 30.5948444 | H       | 10.8109356 | 26.3898736 | 19.7634659 | C  | 0.2291979   | 27.1926498 | 32.5064697 |
| S       | -0.7582846  | 29.9505841 | 28.8103129 | H       | 11.0482104 | 25.3129788 | 21.0538123 | S  | 1.9646171   | 26.6710948 | 32.2588397 |
| C       | 1.3784917   | 30.6210998 | 26.7078686 | Fe      | 2.9577659  | 30.4503296 | 29.8745996 | C  | 6.9139278   | 31.4752388 | 32.9484498 |
| O       | 2.1907606   | 30.0590591 | 26.0943140 | Fe      | 4.3662765  | 28.4337036 | 28.8968547 | S  | 6.5370724   | 29.7086103 | 32.6529129 |
| C       | -3.3193859  | 31.9042045 | 26.3068311 | S       | 5.0797471  | 30.5469386 | 29.1850662 | H  | -3.3128400  | 29.6542492 | 29.0143586 |
| O       | -3.9958076  | 32.4894802 | 25.5776475 | S       | 2.1223481  | 28.5029700 | 29.1405143 | H  | -5.3441011  | 28.0526396 | 29.3161371 |
| C       | -0.9616538  | 31.0687194 | 25.9825344 | H       | -0.2208715 | 27.2794292 | 31.5094020 | H  | -4.8931675  | 28.5082449 | 30.9794964 |
| O       | -0.8784853  | 30.8703359 | 24.8275945 | H       | -4.4710503 | 26.8662747 | 30.7136969 | H  | 0.1960905   | 28.1655168 | 33.0122005 |
| N       | -1.9441197  | 31.5659933 | 30.7663889 | H       | -9.2378542 | 20.8800411 | 23.6089254 | H  | -0.2545133  | 26.4410228 | 33.1441333 |
| H       | -2.8769073  | 31.2707253 | 30.4623579 | H       | 8.9077003  | 24.2111513 | 20.5984138 | H  | 7.1365504   | 31.9938462 | 32.0079470 |
| H       | 2.3272503   | 34.2563101 | 28.0819327 | H       | 6.1952441  | 29.4438220 | 25.9999527 | H  | 7.7930370   | 31.5196479 | 33.6044448 |
| H       | 3.4236730   | 32.9383001 | 27.5866310 | H       | 6.4189028  | 31.6658729 | 33.9091821 | Fe | 2.8394027   | 28.1911958 | 30.9796029 |
| H       | -0.5852337  | 33.1271629 | 30.5381526 | H       | 0.5557753  | 26.1693978 | 25.7241512 | Fe | 4.9346108   | 29.6352780 | 31.1690892 |
| H       | -2.3174887  | 33.5866313 | 30.4817158 | H       | 3.5877363  | 33.6473262 | 29.2299820 | S  | 4.8992206   | 27.4490933 | 30.7131507 |
| H       | -0.0186174  | 30.7810759 | 30.9725611 | O       | -3.7778724 | 30.7996047 | 28.6512181 | S  | 2.9262048   | 30.1552788 | 31.9983288 |
| H       | -1.3780144  | 29.6073819 | 31.1039612 | O       | -5.0288505 | 30.3460433 | 28.0480420 | C  | 5.2682739   | 28.8894778 | 25.8077450 |
| C       | -9.4623550  | 19.8487551 | 23.3205802 | H       | -4.7671555 | 29.4572742 | 27.7218123 | S  | 5.2635143   | 27.5890457 | 27.1028428 |
| N       | -9.1766769  | 19.7021988 | 21.8413092 |         |            |            |            | C  | 0.7216843   | 27.0683051 | 26.3273017 |
| H       | -8.8221850  | 19.1450536 | 23.8611498 | State 4 |            |            |            | N  | -0.4804847  | 27.2831991 | 27.1776726 |
| H       | -10.5196992 | 19.6201499 | 23.4855636 | 84      |            |            |            | H  | 4.2710725   | 29.3241865 | 25.6800461 |
| H       | -8.1660428  | 19.9081405 | 21.6278903 |         |            |            |            | H  | 5.5878704   | 28.4282264 | 24.8635332 |
| H       | -9.3840448  | 18.7220623 | 21.5109712 | C       | 2.8858326  | 33.3820994 | 28.4303623 | H  | 1.5659166   | 26.7374342 | 26.9402528 |
| H       | -9.7664047  | 20.3646425 | 21.2735781 | S       | 1.6219511  | 32.2635335 | 29.0964154 | H  | 0.9760503   | 28.0217555 | 25.8549584 |
| C       | -4.7072237  | 27.7904542 | 30.1710166 | Fe      | 0.0399553  | 31.9061225 | 27.4293173 | H  | -0.3172909  | 28.0419734 | 27.8834361 |
| S       | -4.6512128  | 29.1486706 | 31.3863065 | Fe      | -2.3871297 | 31.1898245 | 27.4843194 | H  | -1.3071307  | 27.6649471 | 26.5913160 |
| C       | 0.2291980   | 27.1926574 | 32.5064788 | C       | -2.4469966 | 29.6476301 | 26.3909834 | C  | 9.0870792   | 25.2234914 | 20.2240679 |
| S       | 1.9895019   | 26.6945989 | 32.3948686 | N       | -2.3603012 | 28.6400186 | 25.7910581 | N  | 10.3308071  | 25.8701479 | 20.7962914 |
| C       | 6.9139297   | 31.4752476 | 32.9484591 | C       | 0.5745360  | 33.5437028 | 26.6157101 | H  | -0.7912272  | 26.4532105 | 27.6944499 |
| S       | 6.7363803   | 29.7034534 | 32.5147947 | N       | 0.9129015  | 34.5464889 | 26.1128649 | H  | 8.2155426   | 25.7241035 | 20.6564233 |
| H       | -4.7725094  | 30.1297492 | 30.4570737 | C       | -1.5557582 | 32.7992925 | 30.3466329 | H  | 9.1101937   | 25.3489074 | 19.1372048 |
| H       | -3.9537557  | 27.9490384 | 29.3894817 | S       | -1.6497037 | 33.1149377 | 28.4995451 | H  | 11.2036957  | 25.4205610 | 20.4108944 |
| H       | -5.7029633  | 27.6983788 | 29.7219508 | C       | -0.8661414 | 30.4913960 | 30.4558991 | H  | 10.3674435  | 26.8948811 | 20.5624384 |
| H       | 0.1391998   | 28.1549222 | 33.0251065 | S       | -0.7267084 | 30.1129927 | 28.6091636 | H  | 10.3585810  | 25.7800942 | 21.8422056 |
| H       | -0.3039543  | 26.4242297 | 33.0814228 | C       | 1.2264459  | 30.9652401 | 26.5479734 | Fe | 2.8888736   | 30.4893041 | 29.8150980 |
| H       | 6.4737382   | 32.1211707 | 32.1802313 | O       | 2.0085224  | 30.3572909 | 25.9436131 | Fe | 4.3639078   | 28.4996087 | 28.8754200 |

|         |             |            |            |         |            |            |            |    |             |            |            |
|---------|-------------|------------|------------|---------|------------|------------|------------|----|-------------|------------|------------|
| S       | 5.0541089   | 30.6187969 | 29.2370252 | S       | 6.7118155  | 29.6777970 | 32.6648360 | C  | 0.5873917   | 33.1553279 | 26.5192835 |
| S       | 2.1098870   | 28.5620251 | 28.9941750 | H       | -4.1679407 | 28.9799617 | 32.1935640 | N  | 0.8585819   | 34.0935403 | 25.8700039 |
| H       | -0.3189881  | 27.2555086 | 31.5572044 | H       | -4.2482442 | 27.5732038 | 29.1973438 | C  | -1.3812071  | 32.7927372 | 30.4054023 |
| H       | -4.9734511  | 26.7813271 | 30.5143567 | H       | -5.5495900 | 28.4713516 | 30.0214933 | S  | -1.4523766  | 32.9694183 | 28.5473554 |
| H       | -9.2436935  | 20.7486506 | 23.9032934 | H       | 0.2108162  | 28.0514400 | 33.1895779 | C  | -0.7933339  | 30.4745703 | 30.6985396 |
| H       | 9.1017052   | 24.1635818 | 20.4953371 | H       | -0.3690575 | 26.3783282 | 32.9362121 | S  | -0.5903351  | 29.9493086 | 28.8896978 |
| H       | 5.9728853   | 29.6832359 | 26.0841628 | H       | 7.0738829  | 32.0072905 | 32.0026928 | C  | 1.3163885   | 30.7107535 | 26.6362220 |
| H       | 6.0685110   | 31.9676445 | 33.4445905 | H       | 7.7890824  | 31.6153229 | 33.5968129 | O  | 2.0746683   | 30.1730139 | 25.9363072 |
| H       | 0.4843101   | 26.3273768 | 25.5564817 | Fe      | 2.9544234  | 28.1289168 | 31.1068349 | C  | -3.4264520  | 31.9105460 | 26.7249987 |
| H       | 3.6414094   | 33.5288639 | 29.2120256 | Fe      | 5.0837624  | 29.5292039 | 31.2251670 | O  | -4.2004906  | 32.5185745 | 26.1233737 |
| O       | -3.6848123  | 30.5310406 | 28.6462440 | S       | 5.0057380  | 27.3452964 | 30.7651602 | C  | -1.0883681  | 31.1855038 | 26.1131250 |
| O       | -6.2367632  | 30.0317044 | 27.7770457 | S       | 3.1304320  | 30.0987994 | 32.1383434 | O  | -1.0807033  | 31.0678565 | 24.9453194 |
| H       | -5.3036517  | 30.2013760 | 28.0837700 | C       | 5.2682739  | 28.8894778 | 25.8077450 | N  | -1.7346694  | 31.5097647 | 30.9422520 |
| H       | -6.5764785  | 30.9200933 | 27.5857555 | S       | 5.2216207  | 27.5652826 | 27.0811207 | H  | -2.6553816  | 31.2363299 | 30.5574954 |
|         |             |            |            | C       | 0.7216843  | 27.0683051 | 26.3273017 | H  | 2.2855804   | 34.2575980 | 28.1624985 |
| State 5 |             |            |            | N       | -0.2034170 | 27.2864536 | 27.4798488 | H  | 3.3745669   | 33.0037485 | 27.5262092 |
| 84      |             |            |            | H       | 4.2944023  | 29.3782436 | 25.7134739 | H  | -0.3572265  | 33.0638073 | 30.7011849 |
|         |             |            |            | H       | 5.5412462  | 28.4246114 | 24.8509413 | H  | -2.0817623  | 33.5531562 | 30.7722853 |
| C       | 2.8858326   | 33.3820994 | 28.4303623 | H       | 1.7532011  | 27.0453025 | 26.6975027 | H  | 0.2127512   | 30.7514797 | 31.0426791 |
| S       | 1.7794841   | 32.1588731 | 29.1906379 | H       | 0.6003321  | 27.9041787 | 25.6332294 | H  | -1.1132036  | 29.5459711 | 31.1852248 |
| Fe      | 0.1562191   | 31.5219553 | 27.6524776 | H       | 0.0909265  | 28.1154412 | 28.0496687 | C  | -9.4623496  | 19.8487439 | 23.3205672 |
| Fe      | -2.3458002  | 31.0144212 | 27.7828490 | H       | -1.2283109 | 27.4696672 | 27.2125411 | N  | -9.3450724  | 20.4591537 | 21.9399330 |
| C       | -2.7721378  | 29.2281453 | 27.3426400 | C       | 9.0870792  | 25.2234914 | 20.2240679 | H  | -8.7284806  | 19.0406073 | 23.3972997 |
| N       | -2.8484594  | 28.0677533 | 27.1275861 | N       | 10.5272526 | 25.6540524 | 20.4001301 | H  | -10.4802354 | 19.4633836 | 23.4347583 |
| C       | 0.6355594   | 32.9001080 | 26.4411905 | H       | -0.1732740 | 26.4977147 | 28.1348840 | H  | -8.3802668  | 20.8479686 | 21.7777981 |
| N       | 0.9598828   | 33.7441219 | 25.6941081 | H       | 8.4606738  | 25.8715468 | 20.8444474 | H  | -9.5351204  | 19.7395824 | 21.1901408 |
| C       | -1.2979797  | 33.1291842 | 30.2803251 | H       | 8.8297993  | 25.3291666 | 19.1657869 | H  | -10.0336855 | 21.2457399 | 21.8136440 |
| S       | -1.4523269  | 33.0305021 | 28.4197837 | H       | 11.1759536 | 25.0547783 | 19.8200523 | C  | -4.7072211  | 27.7904386 | 30.1709996 |
| C       | -0.7336218  | 30.8381639 | 30.8829051 | H       | 10.6628956 | 26.6560603 | 20.1039364 | S  | -2.9273384  | 27.4012478 | 30.0204673 |
| S       | -0.7622100  | 30.0369823 | 29.1771531 | H       | 10.8264798 | 25.5728743 | 21.4054434 | C  | 0.2291978   | 27.1926422 | 32.5064606 |
| C       | 1.3483578   | 30.5341600 | 26.8463630 | Fe      | 3.0404169  | 30.4500240 | 29.9574674 | S  | 1.8487687   | 26.5176082 | 31.9681317 |
| O       | 2.1318650   | 29.9834684 | 26.1860765 | Fe      | 4.4511836  | 28.4395653 | 28.9406620 | C  | 6.9139259   | 31.4752300 | 32.9484405 |
| C       | -3.3611151  | 31.8361186 | 26.5936348 | S       | 5.1656478  | 30.5455012 | 29.3079590 | S  | 6.6802447   | 29.7047423 | 32.5350914 |
| O       | -3.9888578  | 32.3795402 | 25.7848492 | S       | 2.1965470  | 28.5291910 | 29.1315571 | H  | -3.3619330  | 29.6996803 | 29.2857362 |
| C       | -1.0273610  | 30.8680720 | 26.3117931 | H       | -0.2074635 | 27.4924060 | 31.5449583 | H  | -5.0658370  | 28.0586242 | 29.1664459 |
| O       | -1.0548186  | 30.4815875 | 25.1962405 | H       | -5.0219989 | 26.8589686 | 30.6543162 | H  | -4.8511046  | 28.6518939 | 30.8319339 |
| N       | -1.5843336  | 31.9674427 | 31.0752818 | H       | -9.2196092 | 20.8713270 | 23.6254290 | H  | 0.3715886   | 28.0453158 | 33.1815870 |
| H       | -2.5735566  | 31.7229709 | 31.0198823 | H       | 9.0044691  | 24.1802230 | 20.5438245 | H  | -0.3155251  | 26.3971035 | 33.0323876 |
| H       | 2.2739622   | 34.2234312 | 28.0891736 | H       | 6.0245565  | 29.6351953 | 26.0811830 | H  | 7.0922676   | 32.0573005 | 32.0350586 |
| H       | 3.4042179   | 32.9486065 | 27.5689674 | H       | 6.0261643  | 31.8819652 | 33.4482732 | H  | 7.7867542   | 31.5574647 | 33.6095285 |
| H       | -0.2570743  | 33.4361825 | 30.4579612 | H       | 0.4589712  | 26.1268000 | 25.8339038 | Fe | 2.9027920   | 28.0943769 | 30.9277798 |
| H       | -1.9746634  | 33.9414969 | 30.5709221 | H       | 3.6129413  | 33.6996454 | 29.1873108 | Fe | 4.9905598   | 29.5613809 | 31.2171854 |
| H       | 0.3118307   | 31.1157016 | 31.0706866 | O       | -3.8467708 | 31.0597616 | 29.2964294 | S  | 4.9478728   | 27.4601267 | 30.6852337 |
| H       | -1.0165124  | 30.0296406 | 31.5668961 | O       | -5.1852524 | 30.6440525 | 28.7892889 | S  | 2.9923255   | 30.0113067 | 31.9378647 |
| C       | -9.4623523  | 19.8487495 | 23.3205737 | H       | -4.8940632 | 30.2156334 | 27.9505211 | C  | 5.2682724   | 28.8894697 | 25.8077378 |
| N       | -9.3096494  | 19.7593679 | 21.8173713 | H       | -3.6329699 | 30.2780436 | 29.9027788 | S  | 5.3420671   | 27.6247120 | 27.1353372 |
| H       | -8.7705404  | 19.1319382 | 23.7736963 |         |            |            |            | C  | 0.7216841   | 27.0682975 | 26.3272943 |
| H       | -10.4989747 | 19.6019171 | 23.5699956 | State 6 |            |            |            | N  | -0.3082893  | 27.1357513 | 27.4003263 |
| H       | -8.3216014  | 19.9896326 | 21.5228061 | 85      |            |            |            | H  | 4.2513609   | 29.2786061 | 25.6945949 |
| H       | -9.5340410  | 18.7848932 | 21.4712694 |         |            |            |            | H  | 5.5830341   | 28.4152459 | 24.8678195 |
| H       | -9.9598169  | 20.4352155 | 21.3300240 | C       | 2.8858318  | 33.3820900 | 28.4303543 | H  | 1.7137258   | 26.9168473 | 26.7654089 |
| C       | -4.7072224  | 27.7904464 | 30.1710081 | S       | 1.7738452  | 32.1353825 | 29.1338205 | H  | 0.7088446   | 28.0182038 | 25.7865269 |
| S       | -3.3954085  | 28.6017197 | 31.1466017 | Fe      | 0.1707662  | 31.6333738 | 27.5812979 | H  | -0.1173710  | 27.9272155 | 28.0685477 |
| C       | 0.2291979   | 27.1926498 | 32.5064697 | Fe      | -2.2358038 | 30.9854733 | 27.6596714 | H  | -1.2913217  | 27.3788840 | 27.0027818 |
| S       | 1.9481135   | 26.5891923 | 32.3006518 | C       | -2.5642266 | 29.2875397 | 26.9143135 | C  | 9.0870766   | 25.2234843 | 20.2240622 |
| C       | 6.9139278   | 31.4752388 | 32.9484498 | N       | -2.6437759 | 28.1776213 | 26.5216458 | N  | 9.9740274   | 26.0338815 | 21.1465328 |

|         |            |            |            |    |             |            |            |         |             |            |            |
|---------|------------|------------|------------|----|-------------|------------|------------|---------|-------------|------------|------------|
| H       | -0.3560948 | 26.2760412 | 27.9552235 | H  | -10.4662368 | 19.5079911 | 23.0490743 | H       | -4.0612968  | 31.8930368 | 29.0582969 |
| H       | 8.0544571  | 25.5515681 | 20.3759436 | H  | -8.1791294  | 21.4361306 | 22.7031579 |         |             |            |            |
| H       | 9.4092200  | 25.4102420 | 19.1949707 | H  | -9.1653242  | 20.8322039 | 21.4502148 | State 9 |             |            |            |
| H       | 10.9852958 | 25.7550656 | 21.0400758 | H  | -9.8315191  | 21.8405423 | 22.6534570 | 84      |             |            |            |
| H       | 9.9014965  | 27.0614148 | 20.9380516 | C  | -4.7072211  | 27.7904386 | 30.1709996 |         |             |            |            |
| H       | 9.7071994  | 25.8932708 | 22.1520872 | S  | -3.7170101  | 28.8948080 | 31.2319521 | C       | 2.8858318   | 33.3820900 | 28.4303543 |
| Fe      | 3.0129913  | 30.4017543 | 29.8035572 | C  | 0.2291978   | 27.1926422 | 32.5064606 | S       | 1.6558741   | 32.2270217 | 29.1067438 |
| Fe      | 4.4771890  | 28.5558118 | 28.8965823 | S  | 1.1657614   | 26.7108575 | 30.9970172 | Fe      | 0.0322353   | 31.7792566 | 27.5344283 |
| S       | 5.1203321  | 30.6130254 | 29.3345157 | C  | 6.9139259   | 31.4752300 | 32.9484405 | Fe      | -2.4348823  | 31.1613772 | 27.5837021 |
| S       | 2.2821747  | 28.5568101 | 28.9109894 | S  | 5.8659303   | 30.0074583 | 33.2775850 | C       | -2.9379816  | 29.4950115 | 26.9249864 |
| H       | -0.3557053 | 27.5199869 | 31.6372921 | H  | -4.4271338  | 30.7812547 | 30.0738891 | N       | -3.1184768  | 28.3897572 | 26.5337104 |
| H       | -5.2601729 | 26.9215287 | 30.5472878 | H  | -4.0349033  | 27.4985273 | 29.3543089 | C       | 0.4789923   | 33.3342805 | 26.5416316 |
| H       | -9.2571079 | 20.6322842 | 24.0561640 | H  | -5.5631111  | 28.3201791 | 29.7353150 | N       | 0.7867508   | 34.2973716 | 25.9470019 |
| H       | 9.2031122  | 24.1670495 | 20.4846199 | H  | 0.7453487   | 28.0044019 | 33.0278342 | C       | -1.4335317  | 32.8589888 | 30.4296317 |
| H       | 5.9471990  | 29.7188126 | 26.0416790 | H  | 0.1483651   | 26.3217593 | 33.1687704 | S       | -1.6444720  | 33.0698322 | 28.5734339 |
| H       | 6.0306358  | 31.8740104 | 33.4627428 | H  | 7.5173681   | 31.3165212 | 32.0472709 | C       | -0.8355990  | 30.5253404 | 30.6288556 |
| H       | 0.4658635  | 26.2511576 | 25.6438927 | H  | 7.5727101   | 31.6115660 | 33.8158550 | S       | -0.8188375  | 30.0753665 | 28.7912774 |
| H       | 3.6368165  | 33.6313077 | 29.1901258 | Fe | 2.8779580   | 28.0154467 | 30.5962602 | C       | 1.1756704   | 30.8306754 | 26.6290723 |
| O       | -3.6297895 | 30.5979977 | 29.0065439 | Fe | 4.7014461   | 29.5762377 | 31.4908893 | O       | 1.9403163   | 30.2307342 | 25.9849005 |
| O       | -5.7440884 | 29.5397396 | 27.6375722 | S  | 5.0227496   | 27.4722948 | 30.8913811 | C       | -3.6811014  | 32.0582664 | 26.7265298 |
| H       | -5.0404467 | 30.0450816 | 28.1445133 | S  | 2.5292338   | 29.7877548 | 31.8331688 | O       | -4.5026129  | 32.6416385 | 26.1475903 |
| H       | -5.2540875 | 29.2034938 | 26.8672373 | C  | 5.2682724   | 28.8894697 | 25.8077378 | C       | -1.2231436  | 31.3688581 | 26.0842424 |
| H       | -2.6798159 | 27.2408129 | 31.3414962 | S  | 6.0266033   | 28.0985883 | 27.2848474 | O       | -1.2495393  | 31.2371249 | 24.9148735 |
|         |            |            |            | C  | 0.7216841   | 27.0682975 | 26.3272943 | N       | -1.7083606  | 31.5773127 | 31.0073006 |
| State 7 |            |            |            | N  | 0.0129251   | 27.1627251 | 27.6363019 | H       | -2.6923041  | 31.3172815 | 30.8671614 |
| 86      |            |            |            | H  | 4.2210509   | 28.5847627 | 25.7035378 | H       | 2.3509370   | 34.2670175 | 28.0699208 |
|         |            |            |            | H  | 5.8381413   | 28.5738251 | 24.9230956 | H       | 3.4224084   | 32.9225981 | 27.5934476 |
| C       | 2.8858318  | 33.3820900 | 28.4303543 | H  | 1.7990567   | 27.1528761 | 26.4961304 | H       | -0.3899281  | 33.1426755 | 30.6290688 |
| S       | 1.7054700  | 32.2355971 | 29.1818814 | H  | 0.3765844   | 27.8947930 | 25.6974321 | H       | -2.1073413  | 33.6087706 | 30.8614324 |
| Fe      | 0.1636994  | 31.5285130 | 27.6360562 | H  | 0.1999111   | 28.0708902 | 28.1327880 | H       | 0.2068555   | 30.7636394 | 30.8817263 |
| Fe      | -2.2042823 | 30.6666140 | 27.7319477 | H  | -1.0479208  | 27.1629402 | 27.5016951 | H       | -1.1265616  | 29.5886713 | 31.1179914 |
| C       | -2.5961016 | 28.8617961 | 27.3861447 | C  | 9.0870766   | 25.2234843 | 20.2240622 | C       | -9.4623496  | 19.8487439 | 23.3205672 |
| N       | -2.6845507 | 27.6968111 | 27.2108630 | N  | 8.4376014   | 25.9134569 | 21.4066809 | N       | -8.9487222  | 21.2458996 | 23.0452917 |
| C       | 0.4605769  | 33.0222861 | 26.5118668 | H  | 0.2944238   | 26.4443005 | 28.3190709 | H       | -8.7407946  | 19.1365986 | 22.9083259 |
| N       | 0.6919364  | 33.9551614 | 25.8389050 | H  | 8.3349337   | 25.1253714 | 19.4353083 | H       | -10.4362753 | 19.7449172 | 22.8321199 |
| C       | -1.4997812 | 32.8478056 | 30.3300142 | H  | 9.9246571   | 25.8435652 | 19.8899895 | H       | -8.0091051  | 21.4000886 | 23.4966005 |
| S       | -1.6602241 | 32.7682354 | 28.4641756 | H  | 9.1179864   | 26.0337808 | 22.1978085 | H       | -8.8411122  | 21.4128804 | 22.0081171 |
| C       | -0.6859070 | 30.6324436 | 30.8734200 | H  | 8.0834826   | 26.8673800 | 21.1424921 | H       | -9.6113324  | 21.9735027 | 23.4227445 |
| S       | -0.5585062 | 29.8937486 | 29.1309931 | H  | 7.6209478   | 25.3593481 | 21.7699914 | C       | -4.7072211  | 27.7904386 | 30.1709996 |
| C       | 1.4112957  | 30.7430102 | 26.7009981 | Fe | 2.9342325   | 30.4517483 | 29.7824758 | S       | -2.9352555  | 27.6686386 | 29.8978331 |
| O       | 2.2096072  | 30.3425038 | 25.9549947 | Fe | 4.8895694   | 28.7043231 | 29.0530471 | C       | 0.2291978   | 27.1926422 | 32.5064606 |
| C       | -3.4516247 | 31.3078768 | 26.6724149 | S  | 5.1381406   | 30.8132146 | 29.7826602 | S       | 1.9555572   | 26.6351601 | 32.2681231 |
| O       | -4.2476763 | 31.7230783 | 25.9357556 | S  | 2.7577682   | 28.6161618 | 28.5360375 | C       | 6.9139259   | 31.4752300 | 32.9484405 |
| C       | -0.9936097 | 30.7179966 | 26.2591295 | H  | -0.7766224  | 27.5172667 | 32.2097335 | S       | 6.5386385   | 29.7030815 | 32.6840952 |
| O       | -0.9482222 | 30.3675452 | 25.1324527 | H  | -5.0126215  | 26.9021460 | 30.7351929 | H       | -3.0947020  | 27.2677648 | 27.7506481 |
| N       | -1.6647273 | 31.6380343 | 31.0771164 | H  | -9.4212890  | 20.1435677 | 24.3735590 | H       | -5.1403252  | 26.8106486 | 30.4138212 |
| H       | -2.6131359 | 31.2669633 | 30.9969012 | H  | 9.4359242   | 24.2409613 | 20.5560942 | H       | -5.2122341  | 28.2295712 | 29.3019116 |
| H       | 2.3242485  | 34.2258747 | 28.0133506 | H  | 5.3030634   | 29.9815818 | 25.8923386 | H       | 0.2126615   | 28.1569025 | 33.0296328 |
| H       | 3.4381914  | 32.8929655 | 27.6208701 | H  | 6.2921874   | 32.3683869 | 32.8155610 | H       | -0.2857210  | 26.4414367 | 33.1197590 |
| H       | -0.4963892 | 33.2589233 | 30.5137412 | H  | 0.4722386   | 26.1112458 | 25.8566299 | H       | 7.1732163   | 31.9676060 | 32.0031693 |
| H       | -2.2595850 | 33.5759033 | 30.6373272 | H  | 3.5815981   | 33.7122296 | 29.2105892 | H       | 7.7688074   | 31.5333929 | 33.6347688 |
| H       | 0.3129458  | 31.0209079 | 31.1017452 | O  | -4.7935258  | 31.5907291 | 29.6420846 | Fe      | 2.8509669   | 28.1561428 | 30.9920373 |
| H       | -0.8932721 | 29.7614623 | 31.5027003 | O  | -6.3256545  | 29.7541639 | 28.0671125 | Fe      | 4.9367102   | 29.6044331 | 31.2001143 |
| C       | -9.4623496 | 19.8487439 | 23.3205672 | H  | -5.9104825  | 30.5274271 | 28.5184578 | S       | 4.9152858   | 27.4228002 | 30.7227649 |
| N       | -9.1393229 | 21.0656407 | 22.4804448 | H  | -5.6682123  | 29.5065823 | 27.3949718 | S       | 2.9210370   | 30.1122122 | 32.0316131 |
| H       | -8.7159794 | 19.0791125 | 23.1008892 | H  | -4.6689719  | 29.1635090 | 32.1567372 | C       | 5.2682724   | 28.8894697 | 25.8077378 |

|              |            |            |            |    |               |            |            |    |                |            |            |           |  |
|--------------|------------|------------|------------|----|---------------|------------|------------|----|----------------|------------|------------|-----------|--|
| S            | 5.2773520  | 27.5885915 | 27.1028515 | 14 |               |            |            |    |                |            |            |           |  |
| C            | 0.7216841  | 27.0682975 | 26.3272943 |    |               |            |            |    | O              | -1.9776665 | 1.1748431  | 0.0276327 |  |
| N            | -0.4516240 | 27.4674427 | 27.1455544 | O  | -2.4874333    | 2.1197185  | 2.2214244  | H  | -2.3554608     | 2.0851302  | -0.3744648 |           |  |
| H            | 4.2675255  | 29.3188855 | 25.6859216 | O  | -1.3411987    | 2.1800270  | 2.6347344  | O  | -0.6677277     | 1.1758094  | -0.2391729 |           |  |
| H            | 5.5861625  | 28.4326343 | 24.8600719 | O  | 0.1873231     | 0.1505444  | 0.3103856  | O  | 0.2460172      | -1.2313888 | 1.4289590  |           |  |
| H            | 1.5164417  | 26.7073791 | 26.9873006 | H  | 0.2591486     | 0.0097956  | 1.2681598  | H  | -0.6679444     | -1.5865682 | 1.4127848  |           |  |
| H            | 1.0851123  | 27.9486801 | 25.7893855 | H  | -0.7415402    | -0.1504267 | 0.0636568  | H  | 0.1921905      | -0.4814134 | 0.8081329  |           |  |
| H            | -0.2400401 | 28.2525247 | 27.8277910 | O  | -2.3494184    | -0.3334891 | -0.3934546 | O  | -2.6830389     | -1.4569658 | 1.3108353  |           |  |
| H            | -1.2690282 | 27.8251193 | 26.5912211 | H  | -2.4981695    | -0.9184899 | -1.1535847 | H  | -2.9318334     | -1.2974809 | 2.2364788  |           |  |
| C            | 9.0870766  | 25.2234843 | 20.2240622 | H  | -2.5669081    | 0.5941460  | -0.7181396 | H  | -2.6287806     | -0.5659036 | 0.9129064  |           |  |
| N            | 8.4760291  | 25.8481698 | 21.4624329 | O  | -0.0770032    | 2.6939015  | -0.4851047 | O  | -0.1430759     | 3.6116949  | -1.5261793 |           |  |
| H            | -0.8496183 | 26.7090841 | 27.7226548 | H  | 0.5695987     | 2.8751284  | -1.1858779 | H  | 0.4787894      | 4.1903381  | -1.0550666 |           |  |
| H            | 8.3063034  | 25.1540357 | 19.4602640 | H  | 0.1368667     | 1.7690870  | -0.1493959 | H  | -0.0727363     | 2.7200675  | -1.0968960 |           |  |
| H            | 9.9044270  | 25.8694613 | 19.8890315 | O  | -2.6089067    | 2.2068677  | -1.2060956 | O  | -2.6855320     | 3.4169572  | -0.9291595 |           |  |
| H            | 9.1861432  | 25.9415709 | 22.2310166 | H  | -3.1871564    | 2.7720598  | -0.6689070 | H  | -1.7713813     | 3.7223329  | -1.2324444 |           |  |
| H            | 8.0993250  | 26.8078261 | 21.2571240 | H  | -1.6704720    | 2.5002931  | -0.9903299 | H  | -3.2560948     | 3.4093879  | -1.7156834 |           |  |
| H            | 7.6820765  | 25.2659886 | 21.8310604 |    |               |            |            |    |                |            |            |           |  |
| Fe           | 2.8923484  | 30.4680427 | 29.8487816 |    | (O2-) (H2O) 4 |            |            |    | (OOH+) (H2O) 4 |            |            |           |  |
| Fe           | 4.3745457  | 28.4858751 | 28.8883443 | 14 |               |            |            | 15 |                |            |            |           |  |
| S            | 5.0579825  | 30.6044472 | 29.2793436 |    |               |            |            |    |                |            |            |           |  |
| S            | 2.1211754  | 28.5443508 | 29.0080871 | O  | -2.0348679    | 1.2962839  | 0.0586634  | O  | -2.1761066     | 1.2972325  | -0.3096132 |           |  |
| H            | -0.2968766 | 27.2864930 | 31.5479945 | O  | -0.7365408    | 1.4891336  | 0.3410885  | H  | -2.2086647     | 2.7831071  | -0.9457842 |           |  |
| H            | -4.8355149 | 28.4696806 | 31.0261759 | O  | 0.1418729     | -1.0738342 | 1.2573962  | O  | -1.1070587     | 0.6981643  | -0.4742169 |           |  |
| H            | -9.5538686 | 19.7295656 | 24.4045550 | H  | 0.0073547     | -0.1341446 | 0.9750306  | O  | -0.5485890     | -0.9379725 | 1.3601093  |           |  |
| H            | 9.4586185  | 24.2306678 | 20.4951941 | H  | -0.7833203    | -1.3996099 | 1.2130650  | H  | -1.3224225     | -1.4731855 | 1.6822900  |           |  |
| H            | 5.9694079  | 29.6879297 | 26.0797068 | O  | -2.6651567    | -1.2812017 | 0.4508947  | H  | -0.0143989     | -1.5659068 | 0.8428137  |           |  |
| H            | 6.0540226  | 31.9850100 | 33.4001286 | H  | -2.4019274    | -1.6381608 | -0.4130831 | O  | -2.6486129     | -2.5018679 | 2.2683799  |           |  |
| H            | 0.4186947  | 26.2878761 | 25.6206655 | H  | -2.4659828    | -0.2888514 | 0.3512277  | H  | -2.4052480     | -3.2593191 | 2.8276206  |           |  |
| H            | 3.5895868  | 33.6357859 | 29.2316931 | O  | 0.0031780     | 3.9493670  | -0.4238243 | H  | -3.4113124     | -2.0932838 | 2.7111154  |           |  |
| O            | -2.8707289 | 26.6734728 | 28.5541247 | H  | 0.3272724     | 3.7474333  | -1.3167213 | O  | 0.0086998      | 4.6886395  | -1.8104146 |           |  |
| O            | -4.3792385 | 30.8093752 | 29.8446827 | H  | -0.2722463    | 3.0348321  | -0.0736065 | H  | 0.2963262      | 5.4378335  | -1.2566369 |           |  |
| H            | -4.3195533 | 31.5216076 | 29.1726484 | O  | -2.8213129    | 3.7617291  | -1.1682811 | H  | 0.7893288      | 4.1402986  | -2.0096913 |           |  |
| H            | -3.8757515 | 30.0724715 | 29.4285904 | H  | -2.7251494    | 2.8602830  | -0.7704853 | O  | -2.1914444     | 3.7337027  | -1.3137653 |           |  |
|              |            |            |            | H  | -1.9484439    | 4.1459018  | -0.9338914 | H  | -1.1777696     | 4.1215240  | -1.5355644 |           |  |
|              |            |            |            |    |               |            |            | H  | -2.8070027     | 3.8178739  | -2.0679790 |           |  |
| H2O2 (H2O) 4 |            |            |            |    |               |            |            |    |                |            |            |           |  |
| 16           |            |            |            |    | (OH) (H2O) 4  |            |            |    |                |            |            |           |  |
|              |            |            |            | 14 |               |            |            |    |                |            |            |           |  |
| O            | -2.1916665 | 0.9923113  | -0.7054710 |    |               |            |            |    | (H2O) 4        |            |            |           |  |
| H            | -2.3394370 | 1.8819446  | -0.2400365 | O  | -0.5394743    | -1.2592894 | 0.2790870  | 12 |                |            |            |           |  |
| O            | -0.7427122 | 1.0093232  | -0.9387358 | H  | -0.6376506    | -0.2351106 | 0.2771751  |    |                |            |            |           |  |
| H            | -0.3965537 | 0.5356233  | -0.1104799 | O  | -0.8265206    | 1.3307387  | 0.4718298  | O  | 1.8922773      | 0.0003700  | -0.0287481 |           |  |
| O            | -0.0317692 | -0.4164070 | 1.2010720  | H  | -0.3973090    | 1.6881990  | 1.3182805  | O  | -1.8922675     | -0.0003681 | -0.0287572 |           |  |
| H            | -0.8997652 | -0.9183402 | 1.1883223  | H  | -1.7353613    | 1.6706072  | 0.4607562  | O  | 0.0003696      | -1.8922752 | 0.0287497  |           |  |
| H            | -0.0034537 | 0.0286537  | 2.0637816  | O  | 0.3265628     | 2.2069776  | 2.6736535  | O  | -0.0003685     | 1.8922702  | 0.0287549  |           |  |
| O            | -2.5309035 | -1.2796699 | 0.7705986  | H  | 0.6303842     | 1.4192540  | 3.2263534  | H  | 1.2721418      | -0.7927643 | -0.0243494 |           |  |
| H            | -2.6716590 | -2.0422528 | 0.1858765  | H  | 1.1293747     | 2.7150083  | 2.4750945  | H  | -1.2721454     | 0.7927608  | -0.0243491 |           |  |
| H            | -2.5815154 | -0.4767920 | 0.1811979  | O  | 1.0723858     | 0.0360200  | 4.0249582  | H  | -0.7927637     | -1.2721424 | 0.0243495  |           |  |
| O            | -0.1602771 | 3.6861013  | -1.0648525 | H  | 1.1384191     | -0.7269067 | 3.3718704  | H  | 0.7927618      | 1.2721446  | 0.0243490  |           |  |
| H            | 0.7090470  | 3.8778319  | -0.6780984 | H  | 1.9185873     | 0.0504360  | 4.4992766  | H  | 2.4494373      | -0.1002151 | 0.7595129  |           |  |
| H            | -0.2148952 | 2.6930040  | -1.1359305 | O  | 1.2230378     | -1.8960066 | 2.1895905  | H  | -2.4494435     | 0.1002160  | 0.7595217  |           |  |
| O            | -2.3763945 | 3.4187112  | 0.4019359  | H  | 0.9949424     | -2.8018834 | 2.4535409  | H  | -0.1002152     | -2.4494384 | -0.7595144 |           |  |
| H            | -1.5519979 | 3.7456582  | -0.0653258 | H  | 0.5998867     | -1.6734574 | 1.4299538  | H  | 0.1002160      | 2.4494420  | -0.7595195 |           |  |
| H            | -3.1080138 | 3.9471138  | 0.0427281  |    |               |            |            |    |                |            |            |           |  |
|              |            |            |            |    | (OOH) (H2O) 4 |            |            |    |                |            |            |           |  |
| O2 (H2O) 4   |            |            |            | 15 |               |            |            |    |                |            |            |           |  |

## S7 Supplementary references (cited in main text)

- [51] Pronk, S. *et al.* GROMACS 4.5: a high-throughput and highly parallel open source molecular simulation toolkit. *Bioinformatics* **29**, 845–854 (2013).
- [52] Best, R. B. & Mittal, J. Protein simulations with an optimized water model: cooperative helix formation and temperature-induced unfolded state collapse. *J. Phys. Chem. B.* **114**, 14916–14923 (2010).
- [53] Abascal, J. L. F. & Vega, C. A general purpose model for the condensed phases of water: TIP4P/2005. *J. Chem. Phys.* **123**, 234505–234512 (2005).
- [54] Chang, C. H. & Kim, K. Density functional theory calculation of bonding and charge parameters for molecular dynamics studies on [FeFe] hydrogenases. *J. Chem. Theory Comput.* **5**, 1137–1145 (2009).
- [55] Dudko, O. K.; Hummer, G. & Szabo, A. Intrinsic rates and activation free energies from single-molecule pulling experiments. *Phys. Rev. Lett.* **96**, 108101–108104 (2006).
- [56] Berezhkovskii, A., Hummer, G. & Szabo, A. Reactive flux and folding pathways in network models of coarse-grained protein dynamics. *J. Chem. Phys.* **130**, 205102–205105 (2009).
- [57] Liu, C., Liu, T. & Hall, M. B. Influence of the density functional and basis set on the relative stabilities of oxygenated isomers of diiron models for the active site of [FeFe]-hydrogenase. *J. Chem. Theory Comput.* **11**, 205–214 (2015).
- [58] Fourmond, V. QSoas: a versatile software for data analysis. *Anal. Chem.* **88**, 5050–5052 (2016).

## References

- (1) Wang, P.-h.; Bruschi, M.; De Gioia, L.; Blumberger, J. *J. Am. Chem. Soc.* **2013**, *135*, 9493–9502.
- (2) Wang, P.-h.; Best, R. B.; Blumberger, J. *J. Am. Chem. Soc.* **2011**, *133*, 3548–3556.
- (3) Wang, P.-h.; Best, R. B.; Blumberger, J. *Phys. Chem. Chem. Phys.* **2011**, *13*, 7708–7719.

- (4) Wang, P.-h.; Blumberger, J. *Proc. Natl. Acad. Sci. U.S.A.* **2012**, *109*, 6399–6404.
- (5) De Sancho, D.; Kubas, A.; Wang, P.-H.; Blumberger, J.; Best, R. B. *J. Chem. Theory Comput.* **2015**, *11*, 1919–1927.
- (6) Mulder, D. W.; Boyd, E. S.; Sarma, R.; Lange, R. K.; Endrizzi, J. A.; Broderick, J. B.; Peters, J. W. *Nature* **2010**, *465*, 248–251.
- (7) Pandey, A. S.; Harris, T. V.; Giles, L. J.; Peters, J. W.; Szilagy, R. K. *J. Am. Chem. Soc.* **2008**, *130*, 4533–4540.
- (8) Thompson, J. D.; Higgins, D. G.; Gibson, T. J. *Nucleic Acids Research* **1994**, *22*, 4673–4680.
- (9) Roberts, E.; Eargle, J.; Wright, D.; Luthey-Schulten, Z. *BMC Bioinformatics* **2006**, *7*, 1–11.
- (10) Humphrey, W.; Dalke, A.; Schulten, K. *Journal of Molecular Graphics* **1996**, *14*, 33 – 38.
- (11) Pronk, S.; Páll, S.; Schulz, R.; Larsson, P.; Bjelkmar, P.; Apostolov, R.; Shirts, M. R.; Smith, J. C.; Kasson, P. M.; van der Spoel, D.; Hess, B.; Lindahl, E. *Bioinformatics* **2013**, *29*, 845–854.
- (12) Best, R. B.; Mittal, J. *J. Phys. Chem. B.* **2010**, *114*, 14916–14923.
- (13) Abascal, J. L. F.; Vega, C. *J. Chem. Phys.* **2005**, *123*, 234505.
- (14) Chang, C. H.; Kim, K. *J. Chem. Theory Comput.* **2009**, *5*, 1137–1145.
- (15) Bouanich, J.-P. *J. Quant. Spectrosc. Radiat. Transf.* **1992**, *47*, 243 – 250.
- (16) Buckingham, A. D.; Disch, R. L.; Dunmur, D. A. *J. Am. Chem. Soc.* **1968**, *90*, 3104–3107.
- (17) Darden, T.; York, D.; Pedersen, L. *J. Chem. Phys.* **1993**, *98*, 10089–10092.
- (18) Singhal, N.; Pande, V. S. *J. Chem. Phys.* **2005**, *123*, 204909.
- (19) Dudko, O. K.; Hummer, G.; Szabo, A. *Phys. Rev. Lett.* **2006**, *96*, 108101–108104.



- (20) Chodera, J. D.; Singhal, N.; Pande, V. S.; Dill, K. A.; Swope, W. C. *J. Chem. Phys.* **2007**, *126*, 155101.
- (21) Noe, F.; Horenko, I.; Schutte, C.; Smith, J. C. *J. Chem. Phys.* **2007**, *126*, 155102.
- (22) Buchete, N.-V.; Hummer, G. *J. Phys. Chem. B* **2008**, *112*, 6057–6069.
- (23) Daura, X.; Gademann, K.; Jaun, B.; Seebach, D.; van Gunsteren, W. F.; Mark, A. E. *Angew. Chem. Int. Ed.* **1999**, *38*, 236–240.
- (24) Schutte, C.; Noe, F.; Lu, J.; Sarich, M.; Vanden-Eijnden, E. *J. Chem. Phys.* **2011**, *134*, 204105.
- (25) Prinz, J.-H.; Wu, H.; Sarich, M.; Keller, B.; Senne, M.; Held, M.; Chodera, J. D.; Schutte, C.; Noe, F. *J. Chem. Phys.* **2011**, *134*, 174105.
- (26) De Sancho, D.; Mittal, J.; Best, R. B. *J. Chem. Theory Comput.* **2013**, *9*, 1743–1753.
- (27) Greco, C.; Fourmond, V.; Baffert, C.; Wang, P.-h.; Dementin, S.; Bertrand, P.; Bruschi, M.; Blumberger, J.; de Gioia, L.; Leger, C. *Energy & Environ. Sci.* **2014**, *7*, 3543–3573.
- (28) Cornish, A. J.; Gärtner, K.; Yang, H.; Peters, J. W.; Hegg, E. L. *J. Biol. Chem.* **2011**, *286*, 38341–7.
- (29) Knörzer, P.; Silakov, A.; Foster, C. E.; Armstrong, F. A.; Lubitz, W.; Happe, T. *J. Biol. Chem.* **2012**, *287*, 1489–99.
- (30) Hong, G.; Cornish, A. J.; Hegg, E. L.; Pachter, R. *Biochim. Biophys. Acta* **2011**, *1807*, 510–7.
- (31) Long, H.; King, P. W.; Chang, C. H. *J. Phys. Chem. B* **2014**, *118*, 890–900.
- (32) Kubas, A.; Sancho, D. D.; Best, R.; Blumberger, J. *Angew. Chem. Int. Ed.* **2014**, *53*, 4081–4084.
- (33) Stiebritz, M. T.; Reiher, M. *Inorganic chemistry* **2009**, *48*, 7127–7140.

- (34) Bruska, M. K.; Stiebritz, M. T.; Reiher, M. *J. Am. Chem. Soc.* **2011**, *133*, 20588–20603.
- (35) Yamaguchi, K. *Chem. Phys. Lett.* **1975**, *33*, 330–335.
- (36) Noodleman, L. *J. Chem. Phys.* **1981**, *74*, 5737–5743.
- (37) Dirac, P. **1929**, *123*, 714–733.
- (38) Slater, J. C. *Phys. Rev.* **1951**, *81*, 385–390.
- (39) Perdew, J. *Phys. Rev. B* **1986**, *33*, 8822–8824.
- (40) Becke, A. D. *Phys. Rev. A* **1988**, *38*, 3098–3100.
- (41) Vosko, S. H.; Wilk, L.; Nusair, M. **1980**, *58*, 1200.
- (42) Grimme, S.; Antony, J.; Ehrlich, S.; Krieg, H. *J. Chem. Phys.* **2010**, *132*, 154104–154119.
- (43) Grimme, S.; Ehrlich, S.; Goerigk, L. *J. Chem. Phys.* **2011**, *32*, 1456–1465.
- (44) Weigend, F.; Häser, M.; Patzelt, H.; Ahlrichs, R. *Chem. Phys. Lett.* **1998**, *294*, 143–152.
- (45) Weigend, F.; Ahlrichs, R. **2005**, *7*, 3297–305.
- (46) Eichkorn, K.; Treutler, O.; Öhm, H.; Häser, M.; Ahlrichs, R. *Chem. Phys. Lett.* **1995**, *240*, 283–290.
- (47) Sierka, M.; Hoge Kamp, A.; Ahlrichs, R. *J. Chem. Phys.* **2003**, *118*, 9136.
- (48) Weigend, F. *Phys. Chem. Chem. Phys.* **2006**, *8*, 1057–65.
- (49) Lee, C.; Yang, W.; Parr, R. G. *Phys. Rev. B* **1988**, *37*, 785–789.
- (50) Becke, A. D. *J. Chem. Phys.* **1993**, *98*, 5648–5652.
- (51) Klamt, A.; Schuurmann, G. *J. Chem. Soc., Perkin Trans. 2* **1993**, 799–805.

- (52) TURBOMOLE V6.3 2010, a development of University of Karlsruhe and Forschungszentrum Karlsruhe GmbH, 1989-2007, TURBOMOLE GmbH, since 2007; available from <http://www.turbomole.com>.
- (53) Reed, A. E.; Weinstock, R. B.; Weinhold, F. *J. Chem. Phys.* **1985**, *83*.
- (54) Tao, J.; Perdew, J. P.; Staroverov, V. N.; Scuseria, G. E. *Phys. Rev. Lett.* **2003**, *91*, 146401.
- (55) Perdew, J. P.; Ernzerhof, M.; Burke, K. *J. Chem. Phys.* **1996**, *105*.
- (56) Adamo, C.; Barone, V. *J. Chem. Phys.* **1999**, *110*.
- (57) Yanai, T.; Tew, D. P.; Handy, N. C. *Chem. Phys. Lett.* **2004**, *393*, 51–57.
- (58) Huntington, L. M. J.; Nooijen, M. *J. Chem. Phys.* **2010**, *133*, 184109.
- (59) Riplinger, C.; Neese, F. *J. Chem. Phys.* **2013**, *138*, 34106.
- (60) Huntington, L. M. J.; Hansen, A.; Neese, F.; Nooijen, M. *J. Chem. Phys.* **2012**, *136*, 64101.
- (61) Neese, F. *Wiley Interdisciplinary Reviews: Computational Molecular Science* **2012**, *2*, 73–78.
- (62) Rienstra-Kiracofe, J. C.; Allen, W. D.; ; III, H. F. S. *The Journal of Physical Chemistry A* **2000**, *104*, 9823–9840.
- (63) Jaque, P.; Marenich, A. V.; Cramer, C. J.; Truhlar, D. G. *The Journal of Physical Chemistry C* **2007**, *111*, 5783–5799.
- (64) Kelly, C. P.; Cramer, C. J.; Truhlar, D. G. *The Journal of Physical Chemistry A* **2006**, *110*, 2493–2499, PMID: 16480309.
- (65) Bielski, B. H. J.; Cabelli, D. E.; Arudi, R. L.; Ross, A. B. *J. Phys. Chem. Ref. Data* **1985**, *14*, 1041–1100.
- (66) Wood, P. *Biochemical Journal* **1988**, *253*, 287–289.

- (67) Silakov, A.; Kamp, C.; Reijerse, E.; Happe, T.; Lubitz, W. *Biochemistry* **2009**, *48*, 7780–7786.
- (68) Liptak, M. D.; Shields, G. C. *International Journal of Quantum Chemistry* **2001**, *85*, 727–741.
- (69) Palascak, M. W.; ; Shields\*, G. C. *The Journal of Physical Chemistry A* **2004**, *108*, 3692–3694.
- (70) Sybirna, K.; Antoine, T.; Lindberg, P.; Fourmond, V.; Rousset, M.; Méjean, V.; Bottin, H. *BMC biotech.* **2008**, *8*, 73+.
- (71) Orain, C.; Saujet, L.; Gauquelin, C.; Soucaille, P.; Meynial-Salles, I.; Baffert, C.; Fourmond, V.; Bottin, H.; Léger, C. *Journal of the American Chemical Society* **2015**, *137*, 12580–12587.
- (72) Fourmond, V.; Greco, C.; Sybirna, K.; Baffert, C.; Wang, P.-H. H.; Ezanno, P.; Montefiori, M.; Bruschi, M.; Meynial-Salles, I.; Soucaille, P.; Blumberger, J.; Bottin, H.; De Gioia, L.; Léger, C. *Nat. Chem.* **2014**, *6*, 336–342.
